# Supplementary material for: Four New Triterpenoids from Callicarpa kwangtungensis
Source: MDPI journal article supplement (doi:10.3390/molecules20059071), 2015-05-19
Supplement: s1 [file s1]

# Supplementary Materials

## 1. The Spectrum of Compound 1

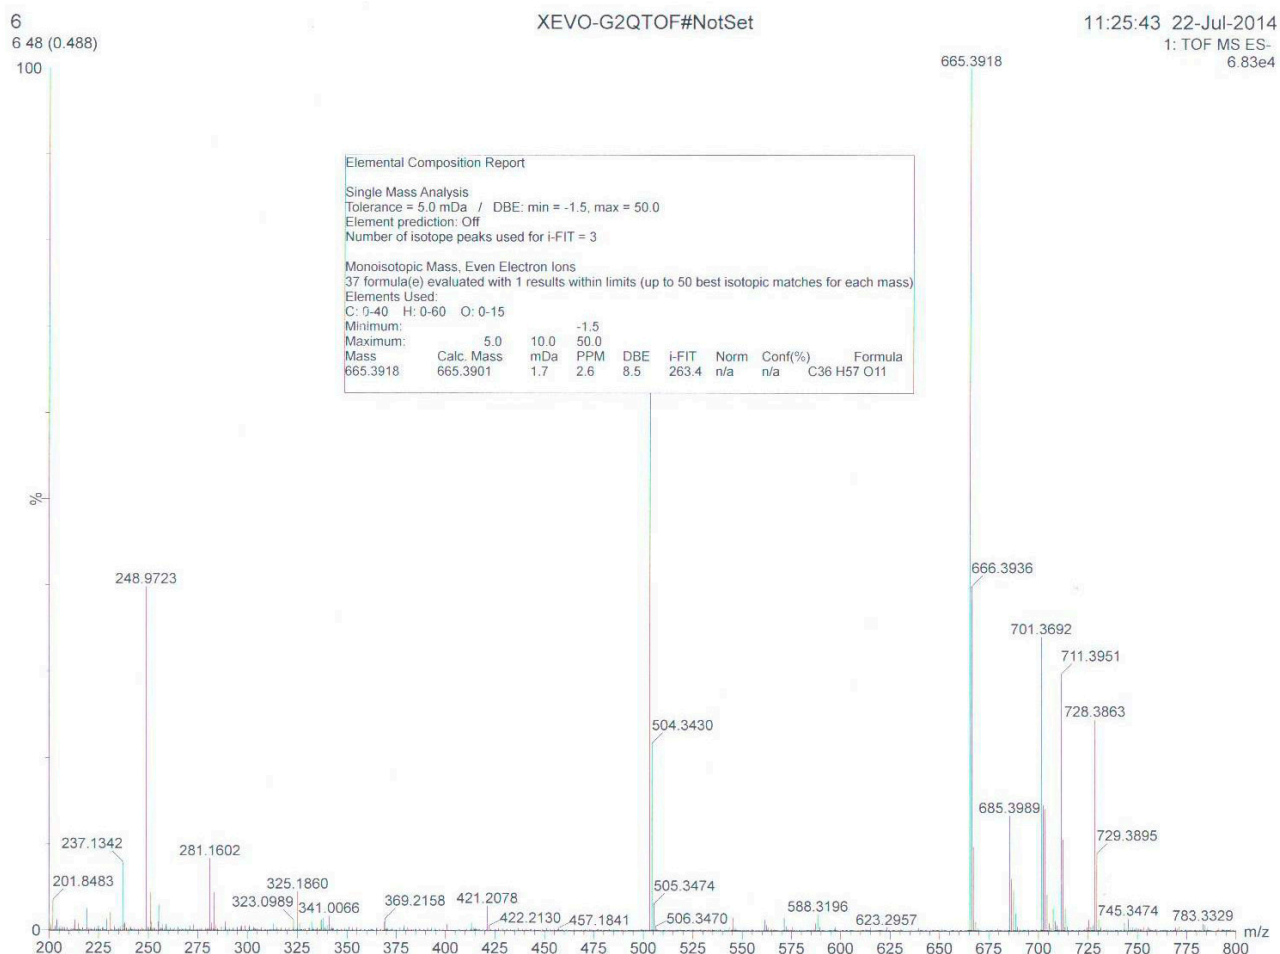

**Figure S1-1.** The HR-ESI-MS Spectrum of Compound 1.

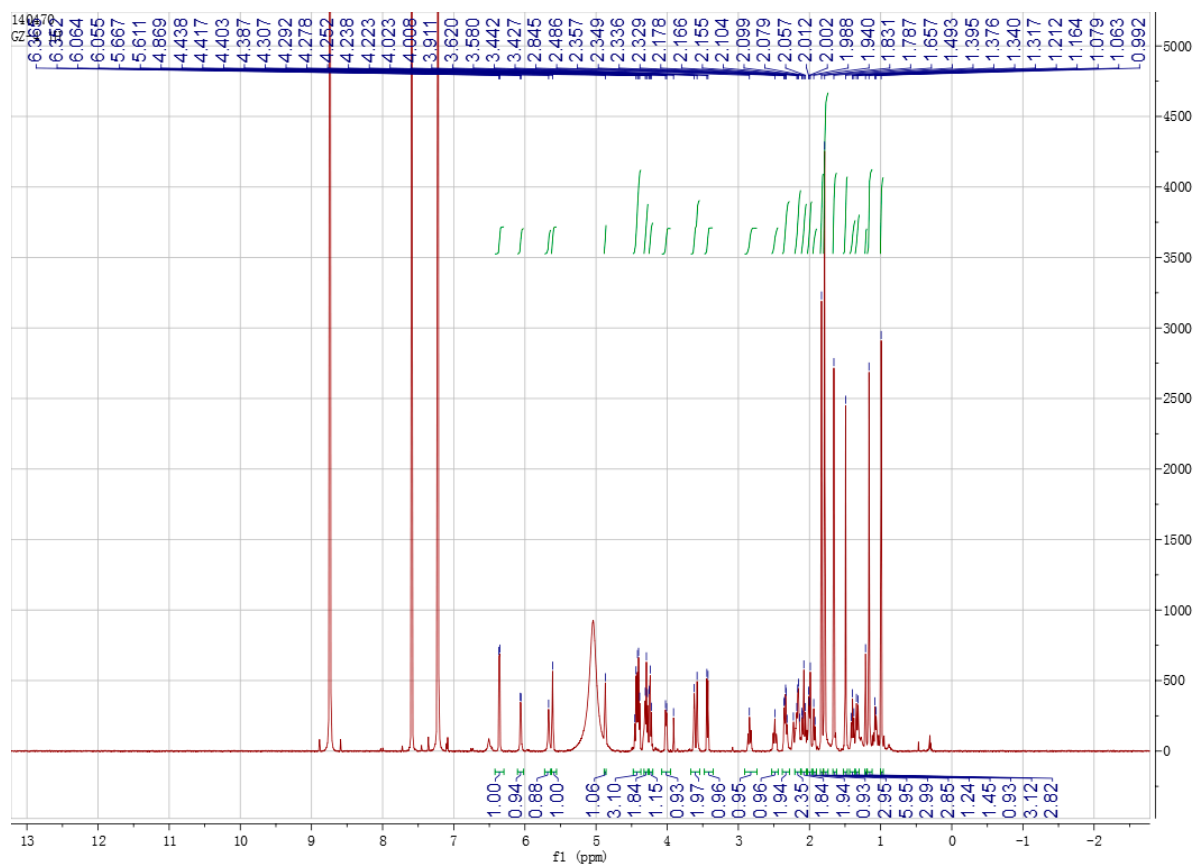

**Figure S1-2.** The Whole  $^1\text{H}$ -NMR Spectrum of Compound **1**.

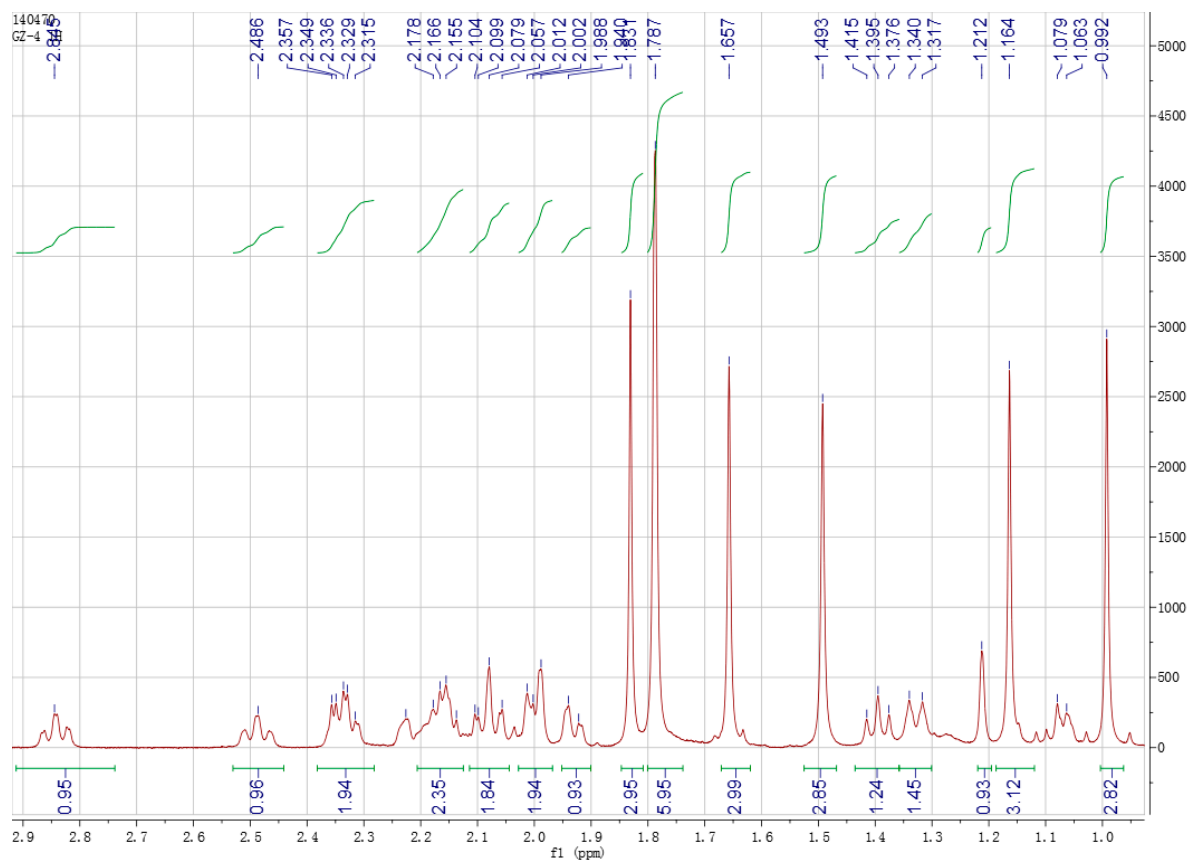

**Figure S1-3.** The Part 1 of the  $^1\text{H}$ -NMR Spectrum of Compound **1**.

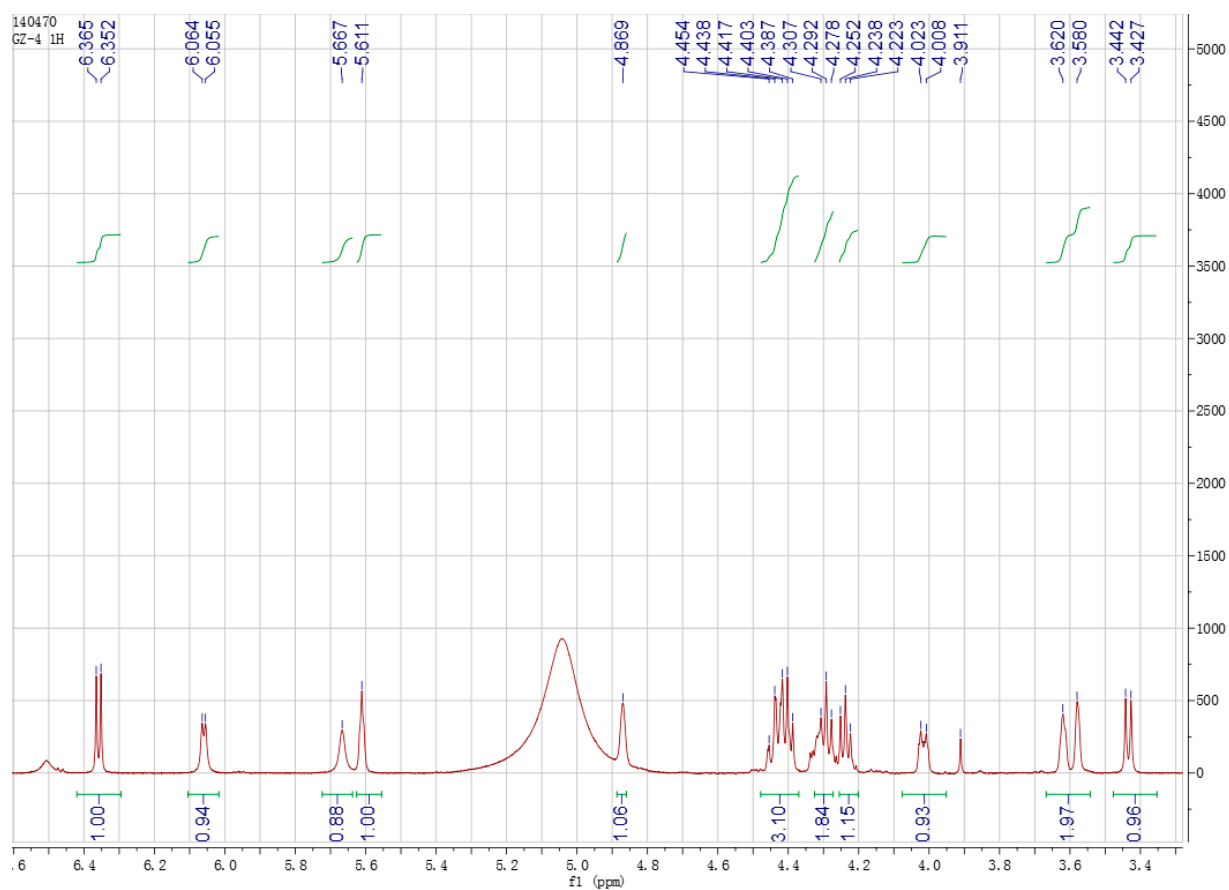

Figure S1-4. The Part 2 of the  $^1\text{H}$ -NMR Spectrum of Compound 1.

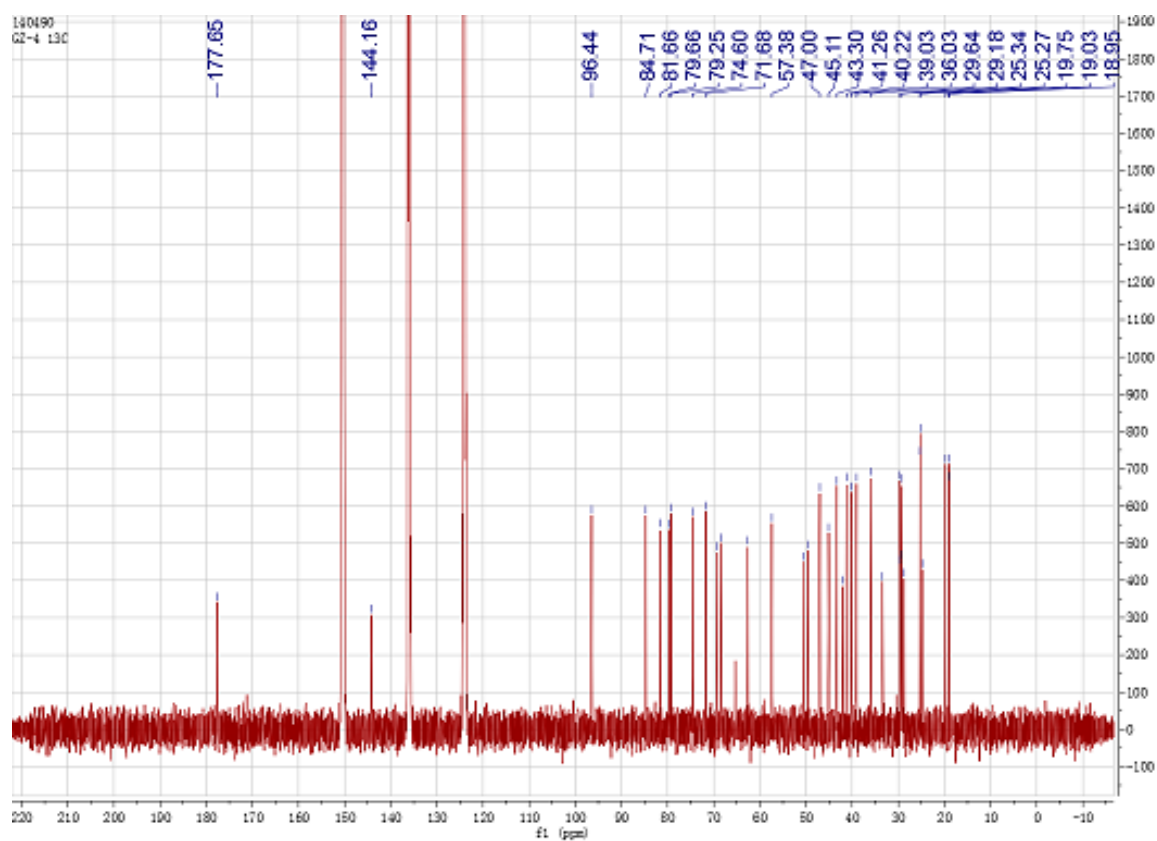

Figure S1-5. The  $^{13}\text{C}$ -NMR Spectrum of Compound 1.

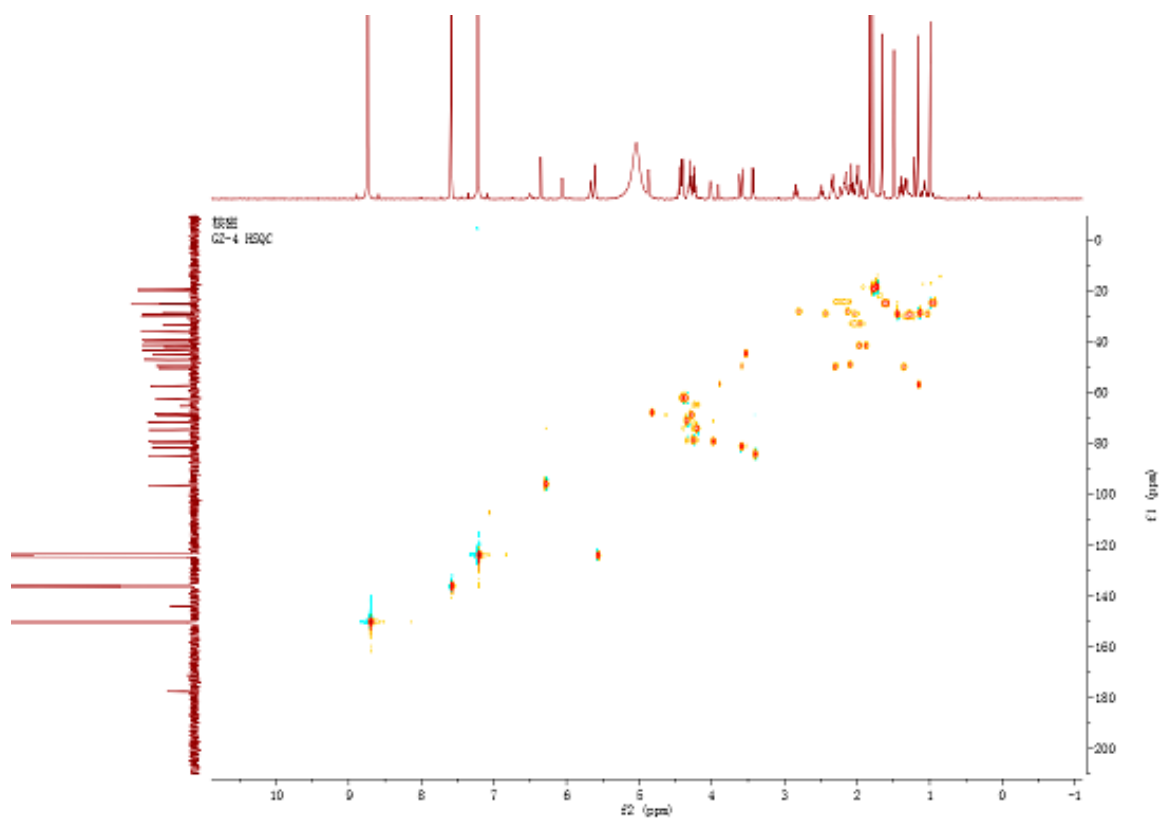

**Figure S1-6.** The Whole HSQC Spectrum of Compound **1**.

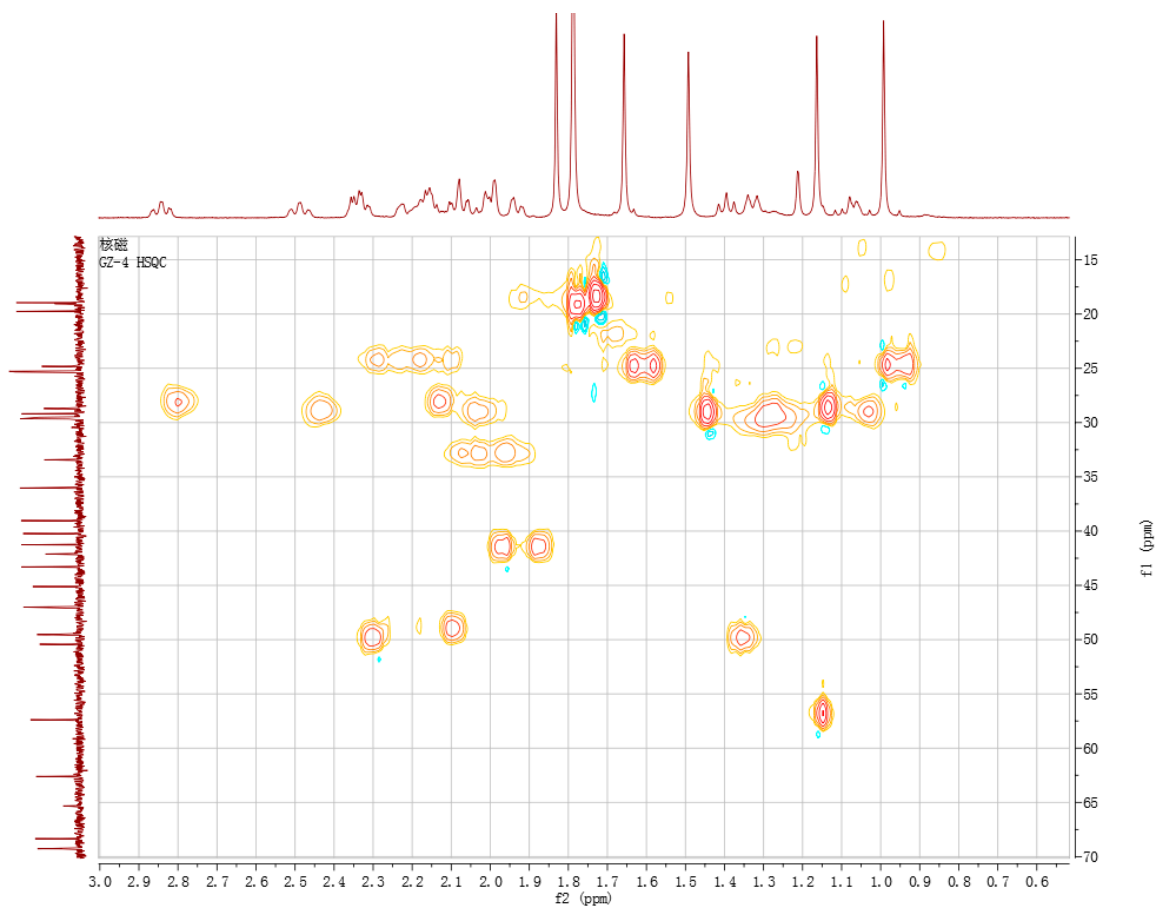

**Figure S1-7.** The Part 1 of the HSQC Spectrum of Compound **1**.



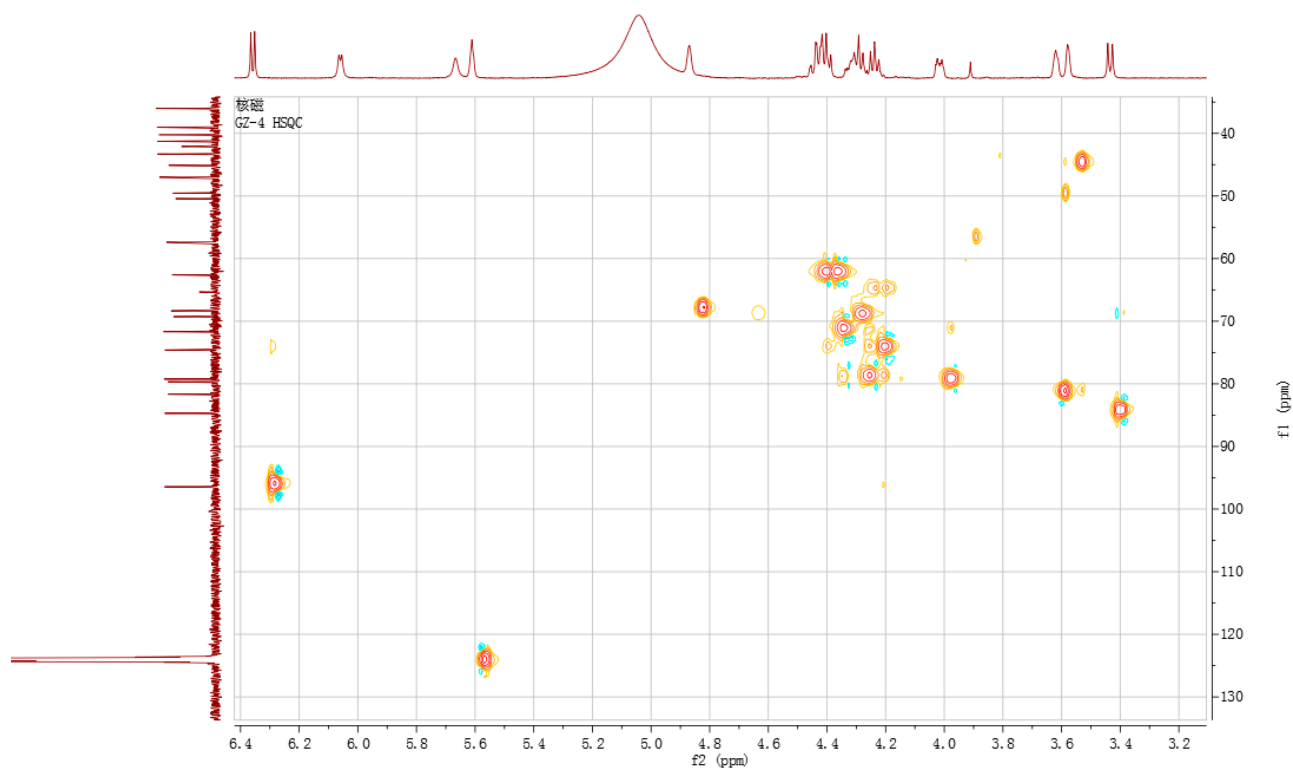

**Figure S1-8.** The Part 2 of the HSQC Spectrum of Compound **1**.

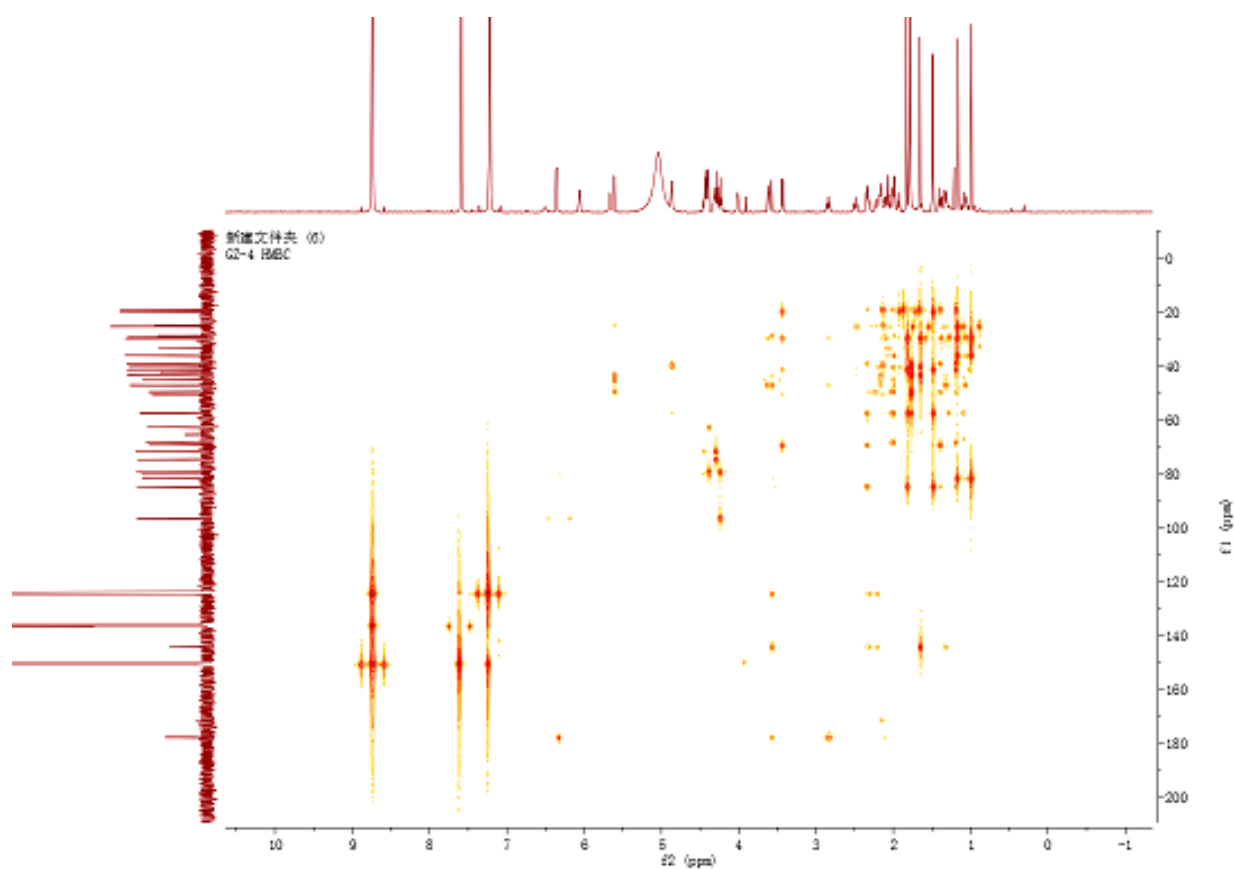

**Figure S1-9.** The Whole HMBC Spectrum of Compound **1**.

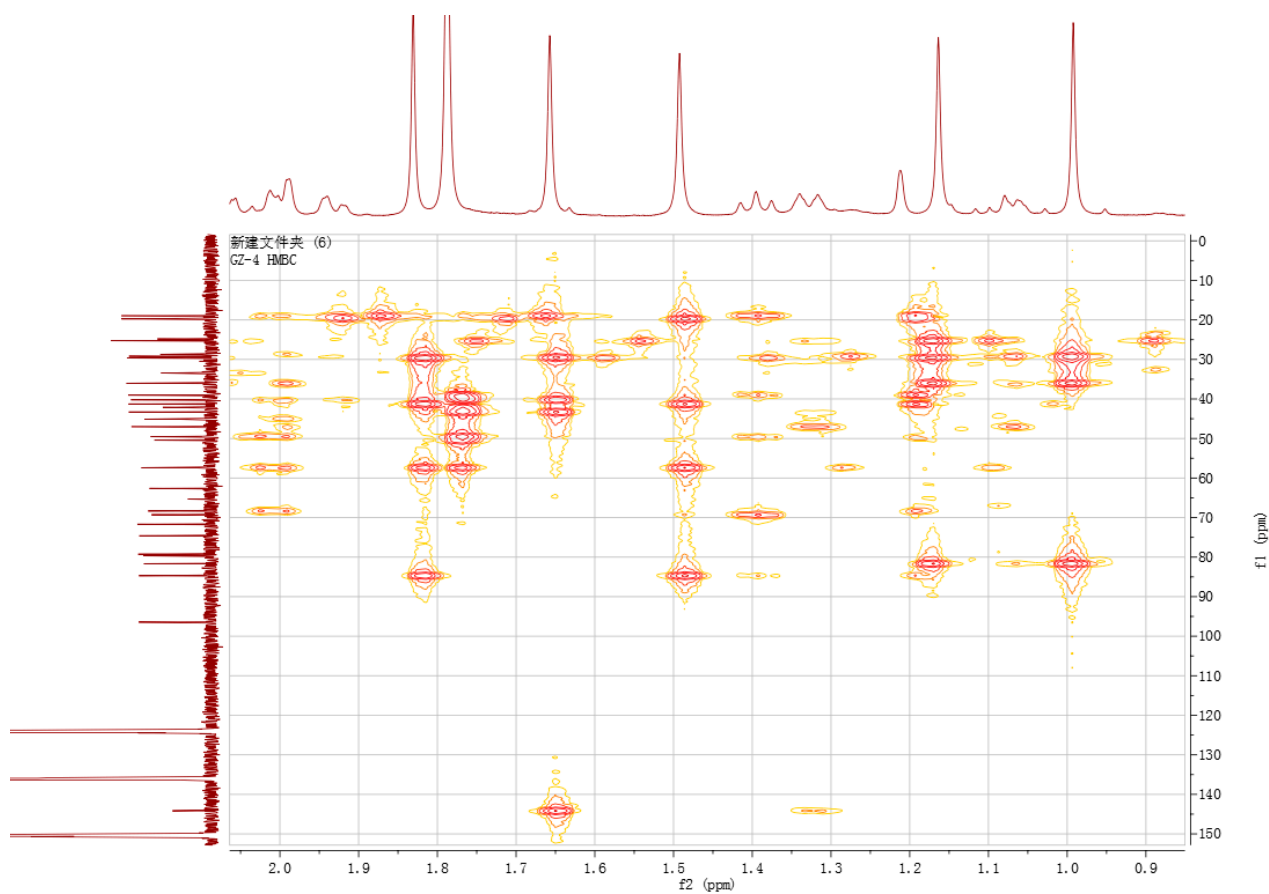

**Figure S1-10.** The Part 2 of HMBC Spectrum of Compound **1**.

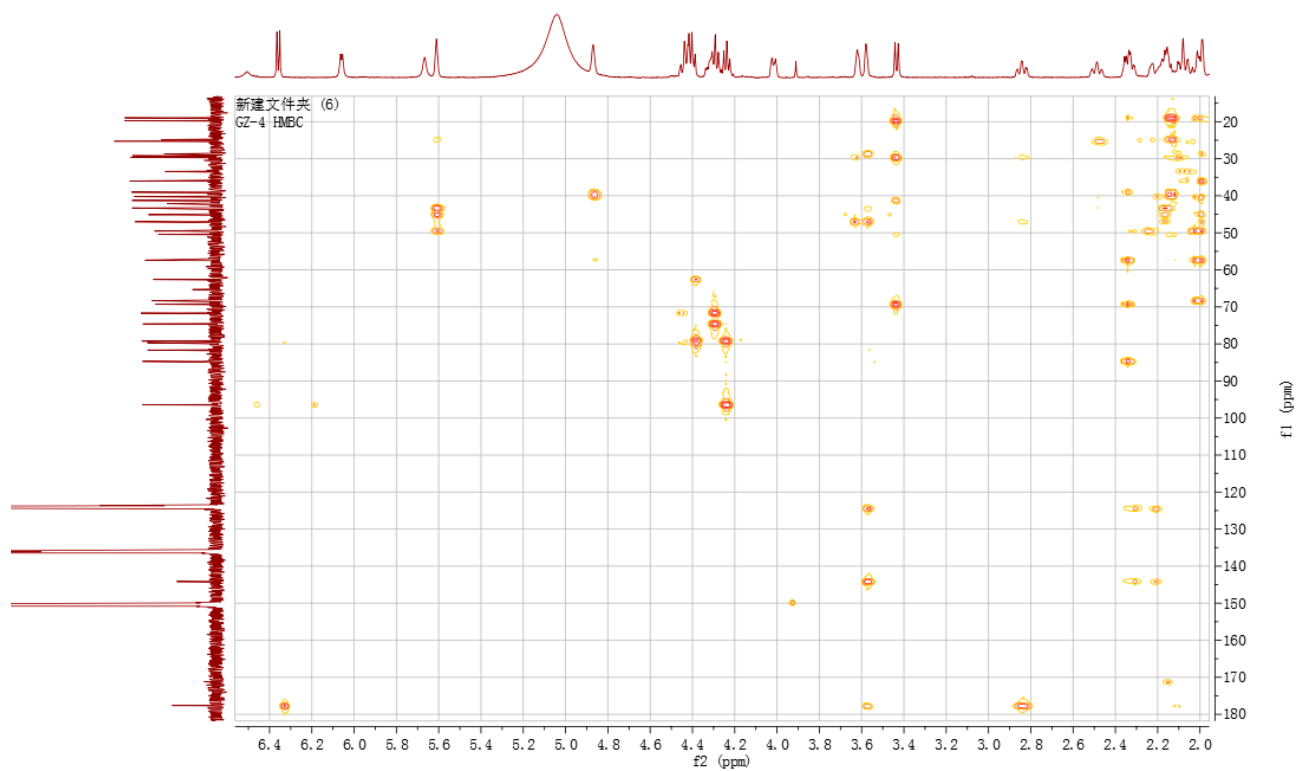

**Figure S1-11.** The Part 1 of the HMBC Spectrum of Compound **1**.

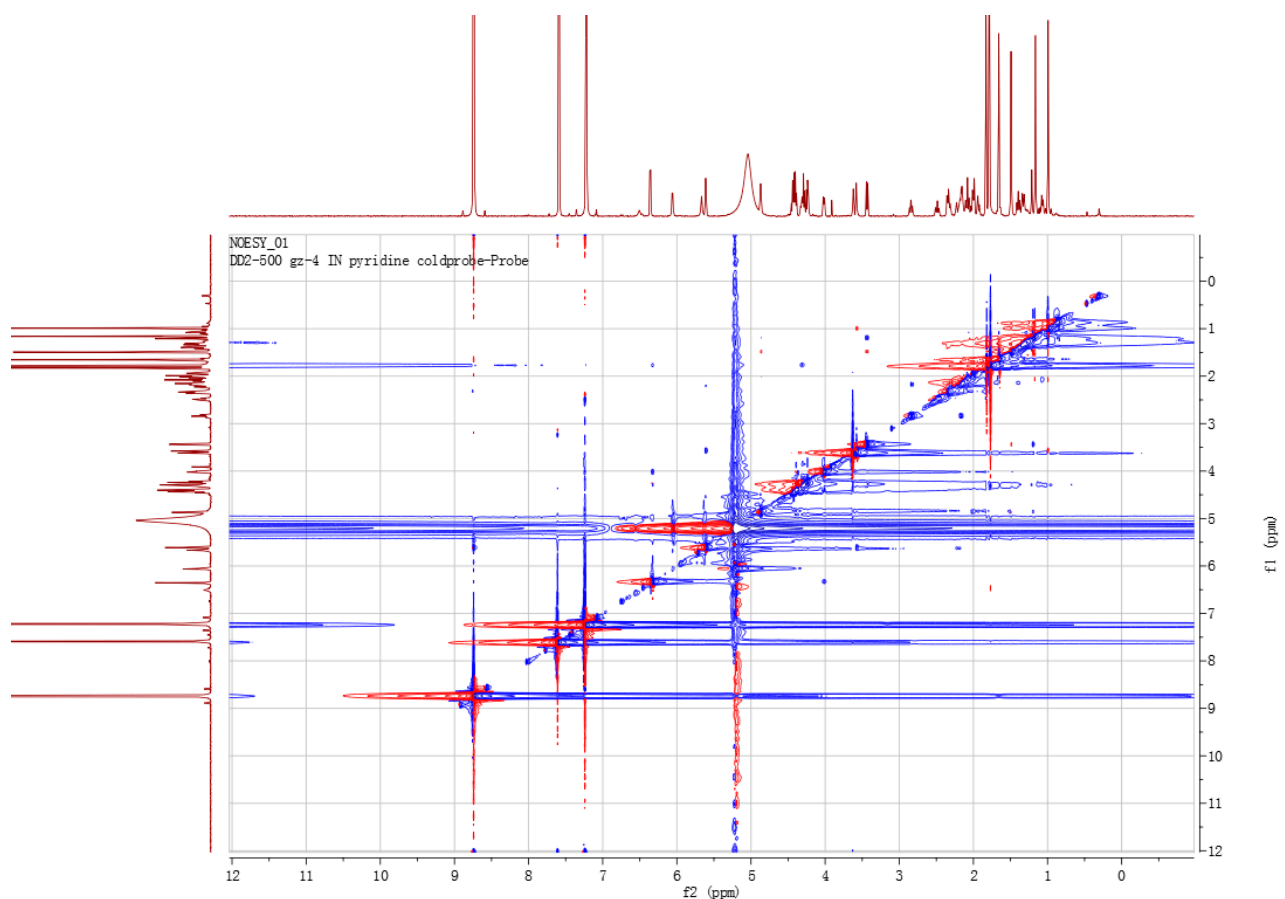

**Figure S1-12.** The Whole NOESY Spectrum of Compound **1**.

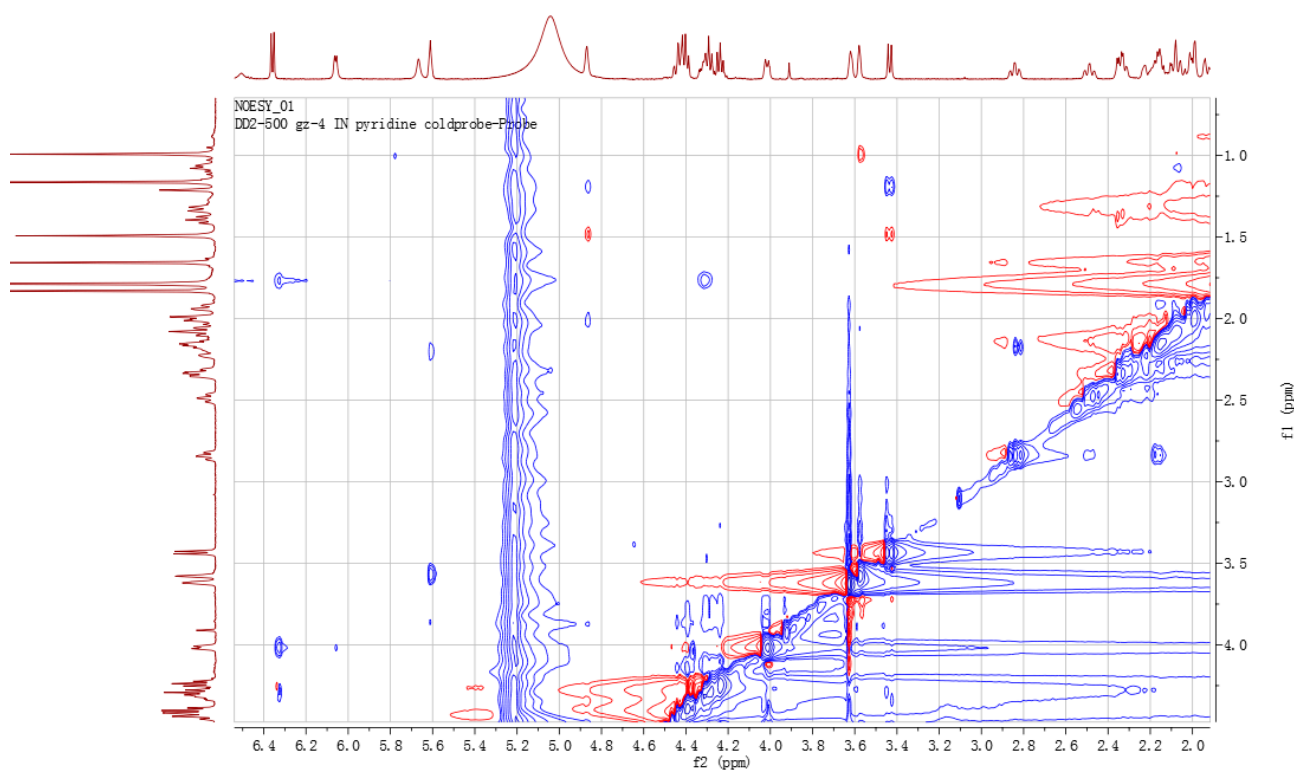

**Figure S1-13.** The Part NOESY Spectrum of Compound **1**.

## 2. The Spectrum of Compound 2

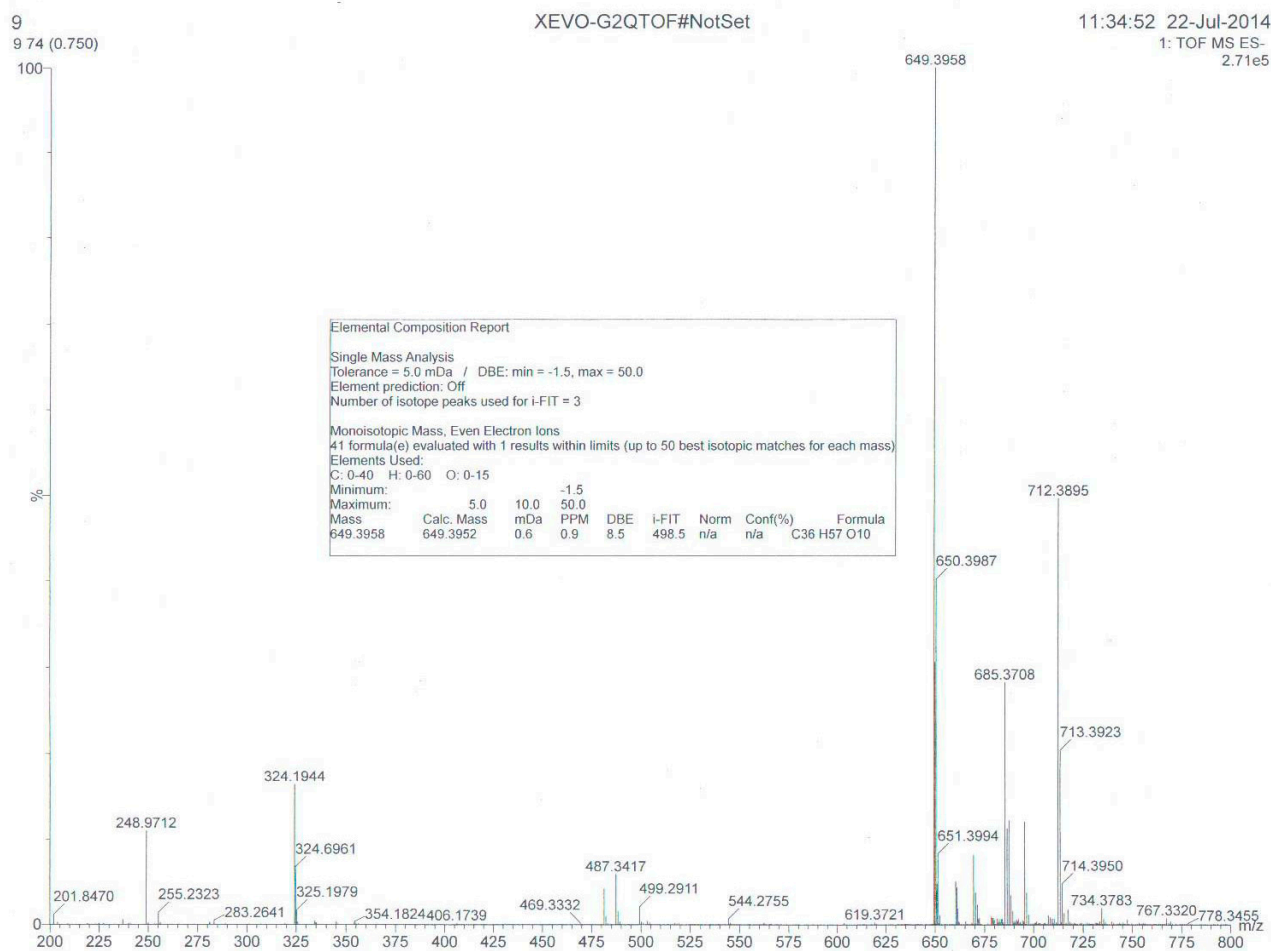

**Figure S2-1.** The HR-ESI-MS Spectrum of Compound 2.

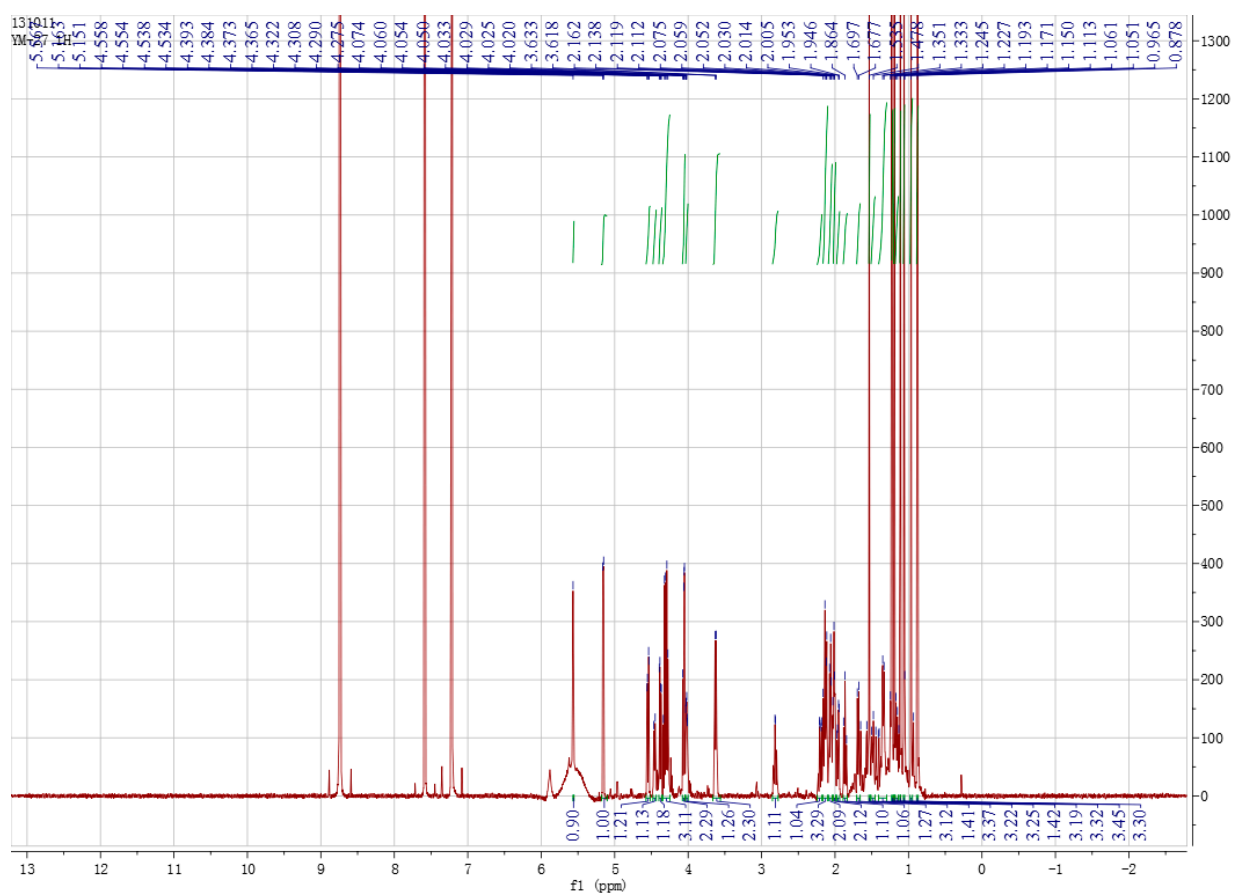

**Figure S2-2.** The Whole  $^1\text{H}$ -NMR Spectrum of Compound **2**.

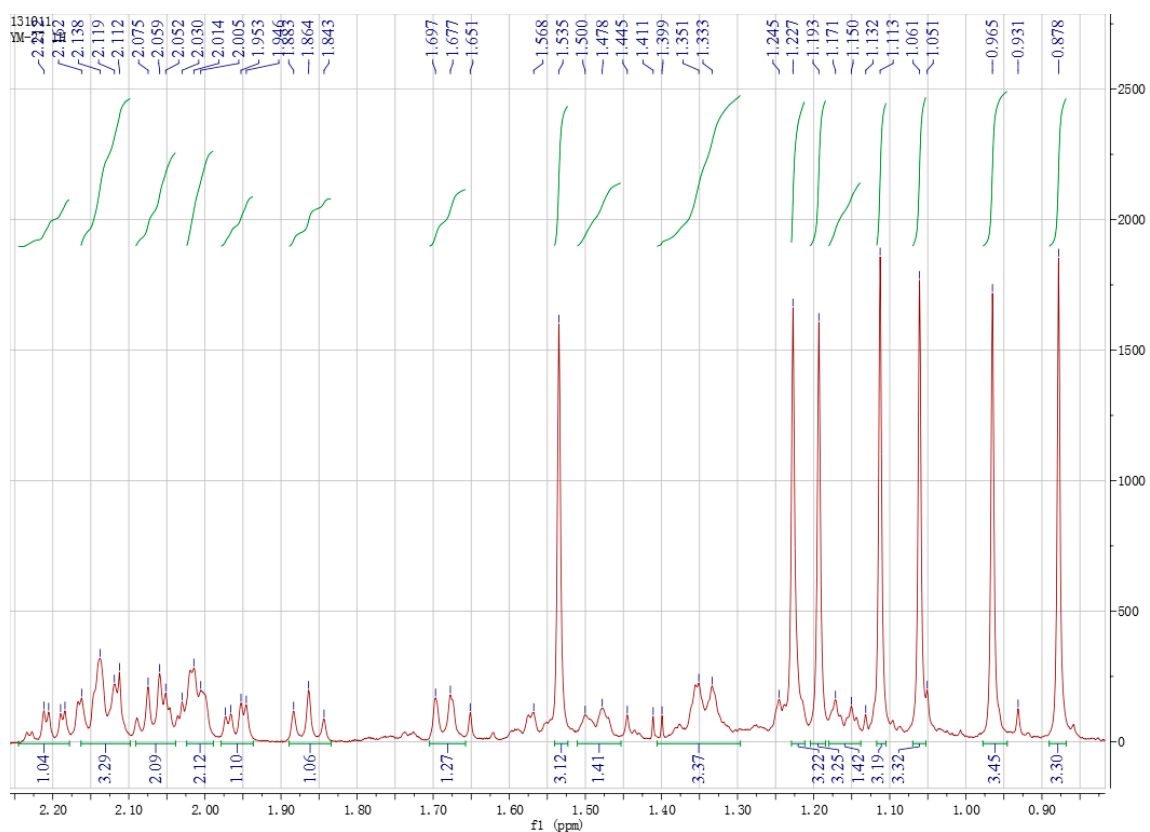

**Figure S2-3.** The Part 1 of the  $^1\text{H}$ -NMR Spectrum of Compound **2**.

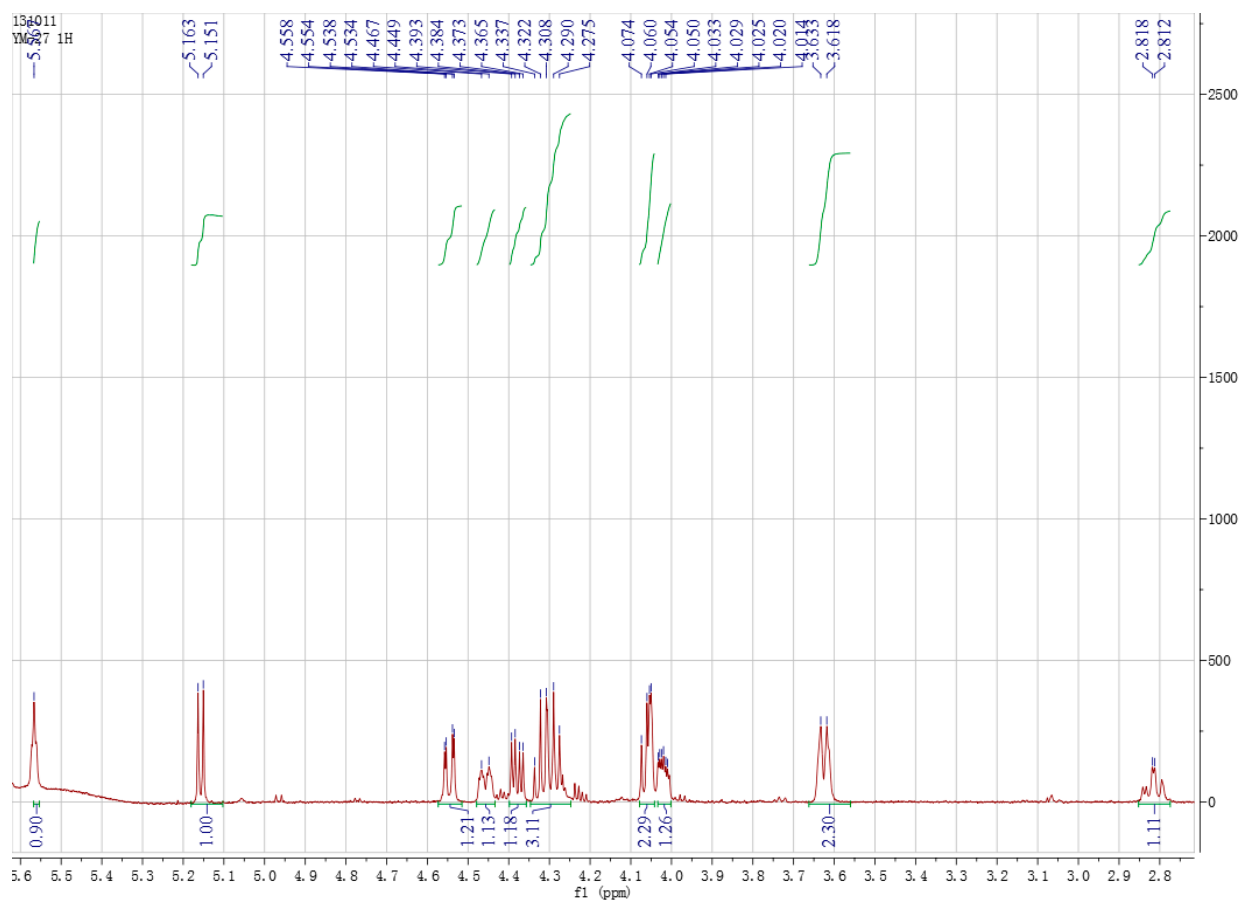

Figure S2-4. The Part 1 of the <sup>1</sup>H-NMR Spectrum of Compound 2.

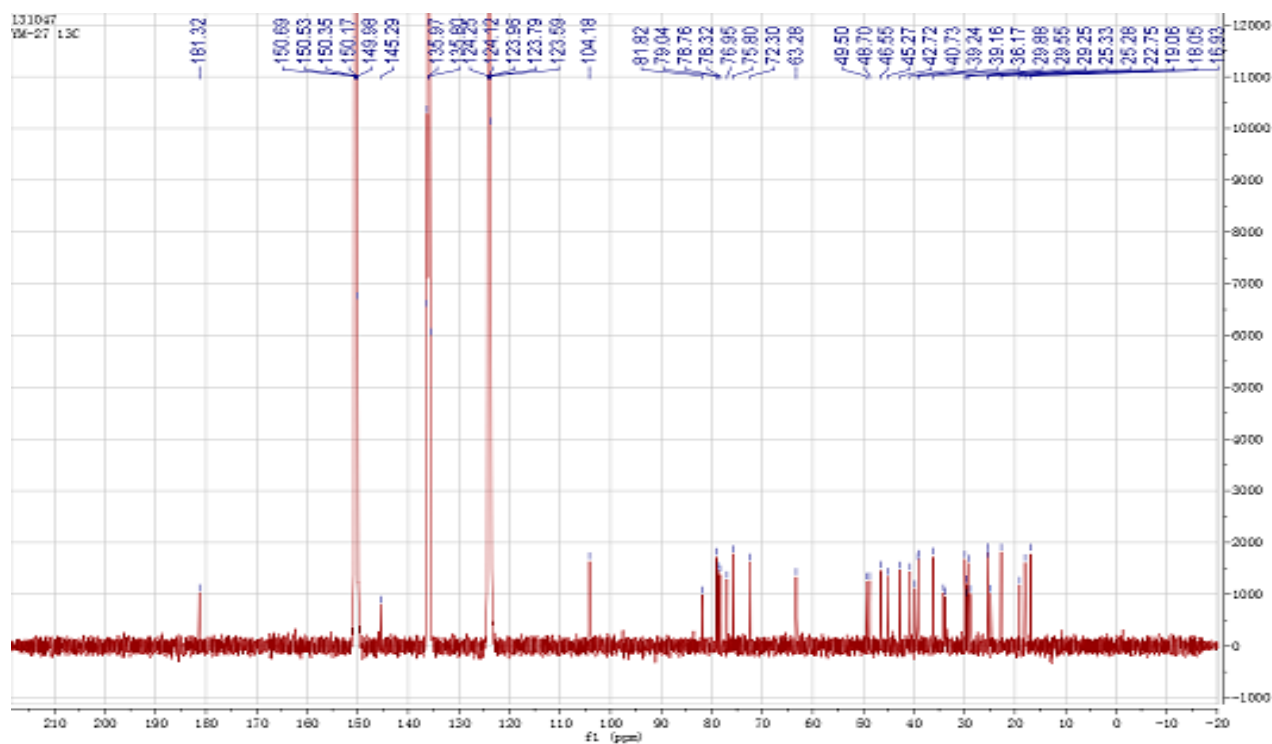

Figure S2-5. The <sup>13</sup>C-NMR Spectrum of Compound 2.

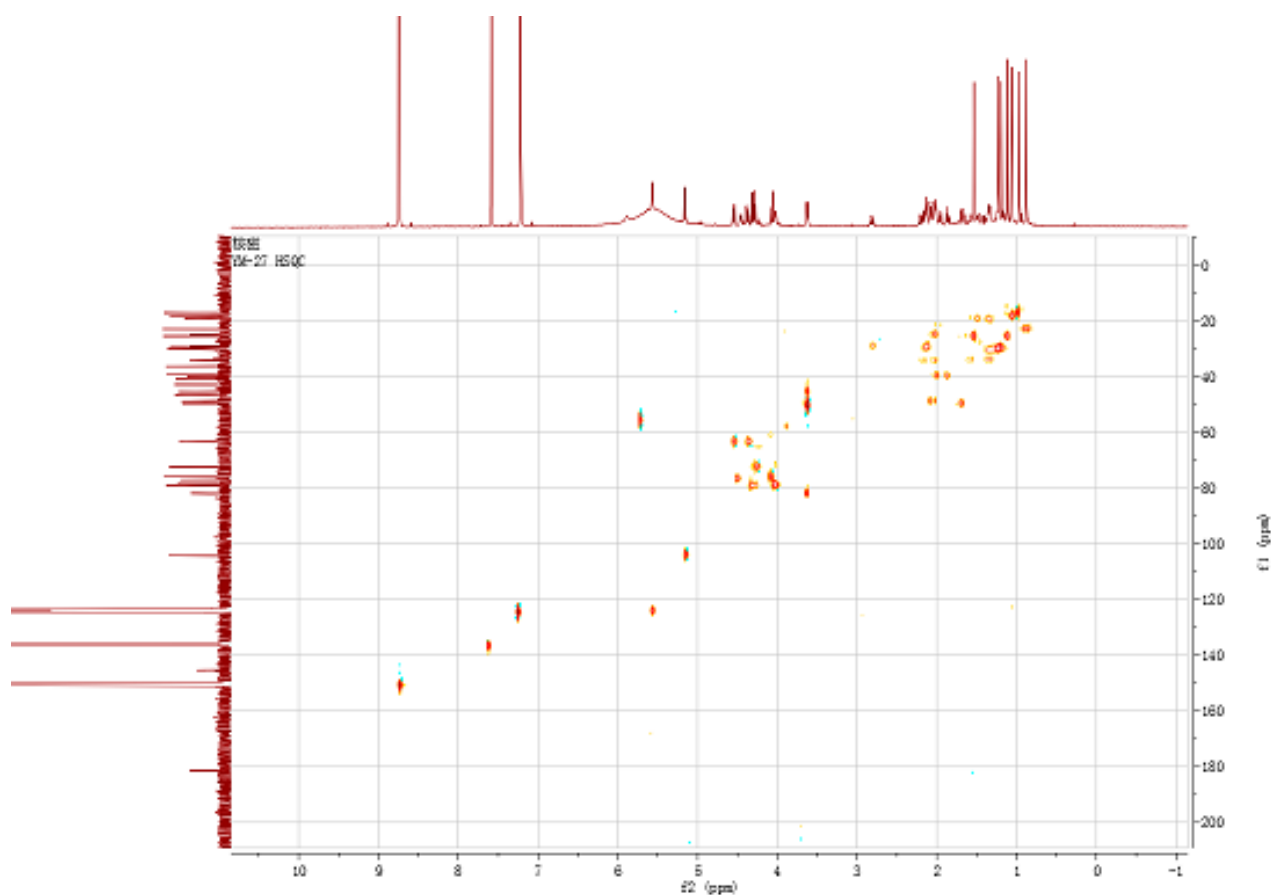

**Figure S2-6.** The Whole HSQC Spectrum of Compound **2**.

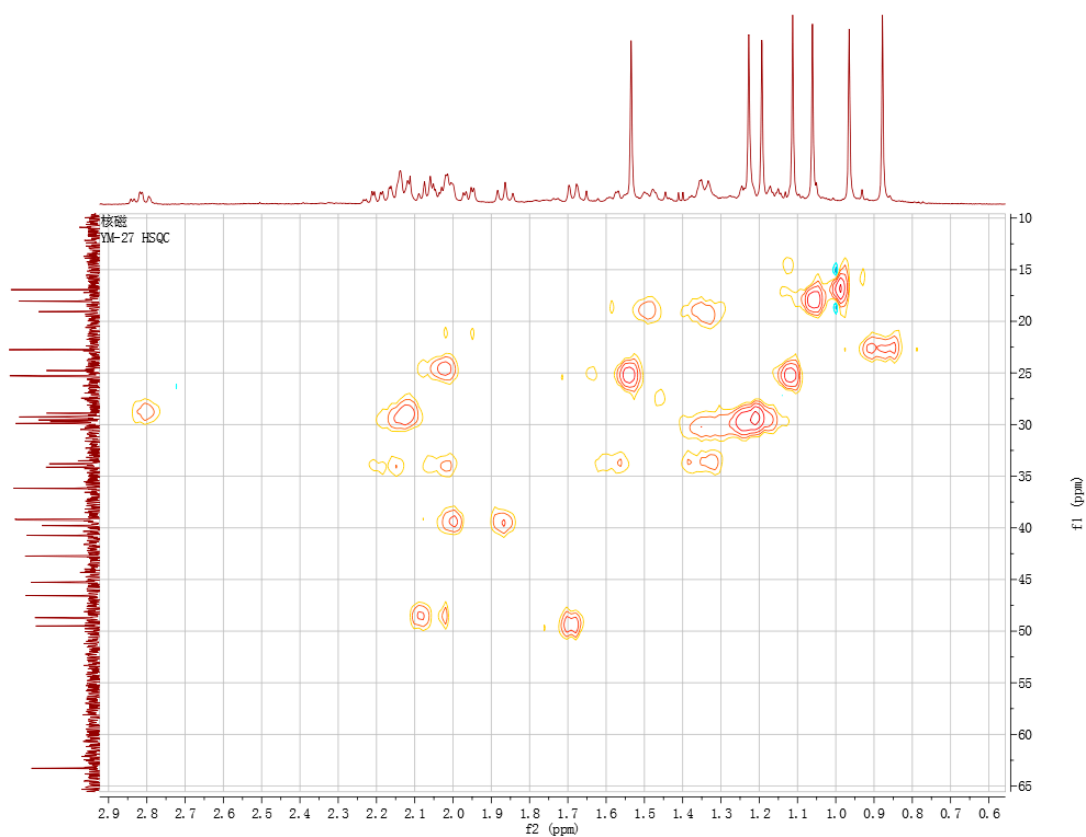

**Figure S2-7.** The Part 1 of the HSQC Spectrum of Compound **2**.

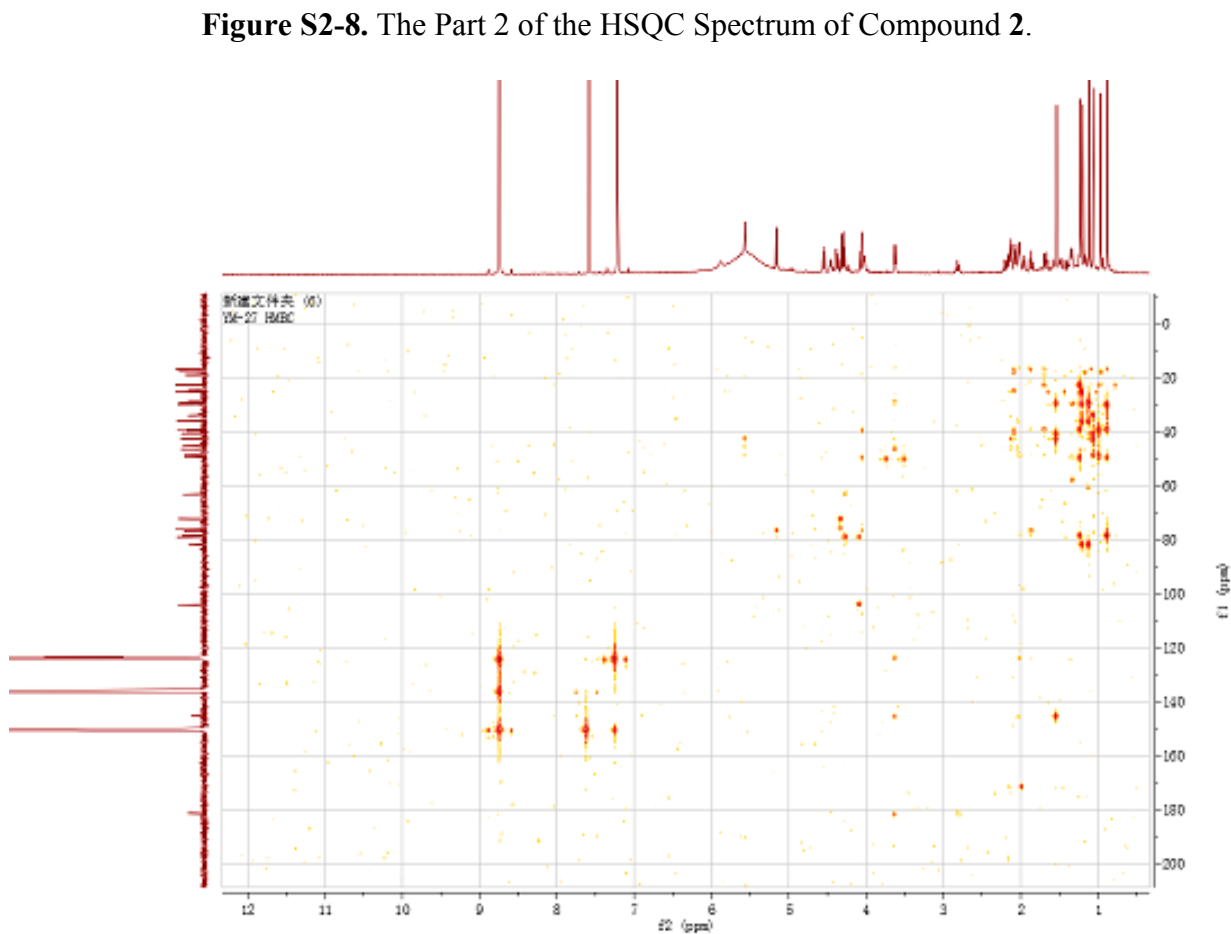

**Figure S2-9.** The Whole HMBC Spectrum of Compound **2**.



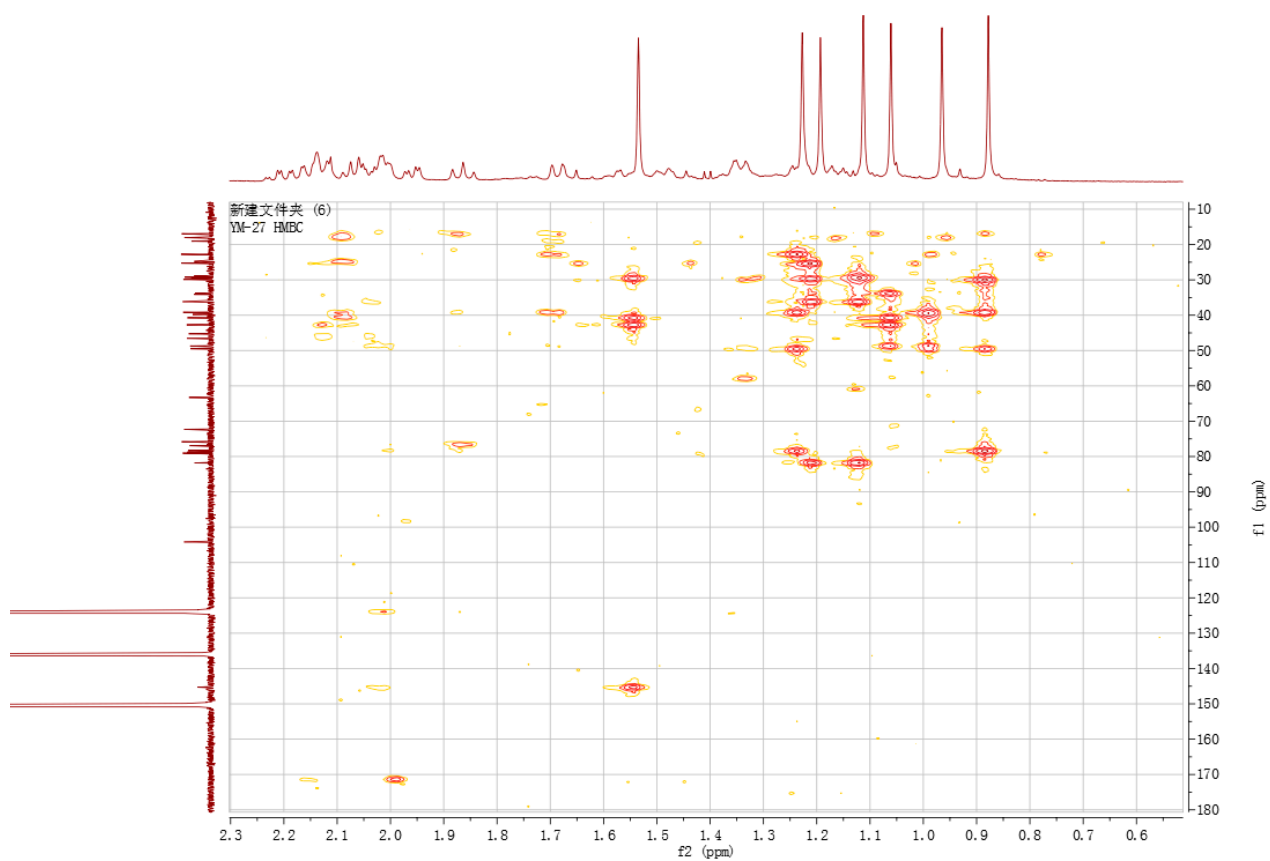

**Figure S2-10.** The Part 1 of the HMBC Spectrum of Compound **2**.

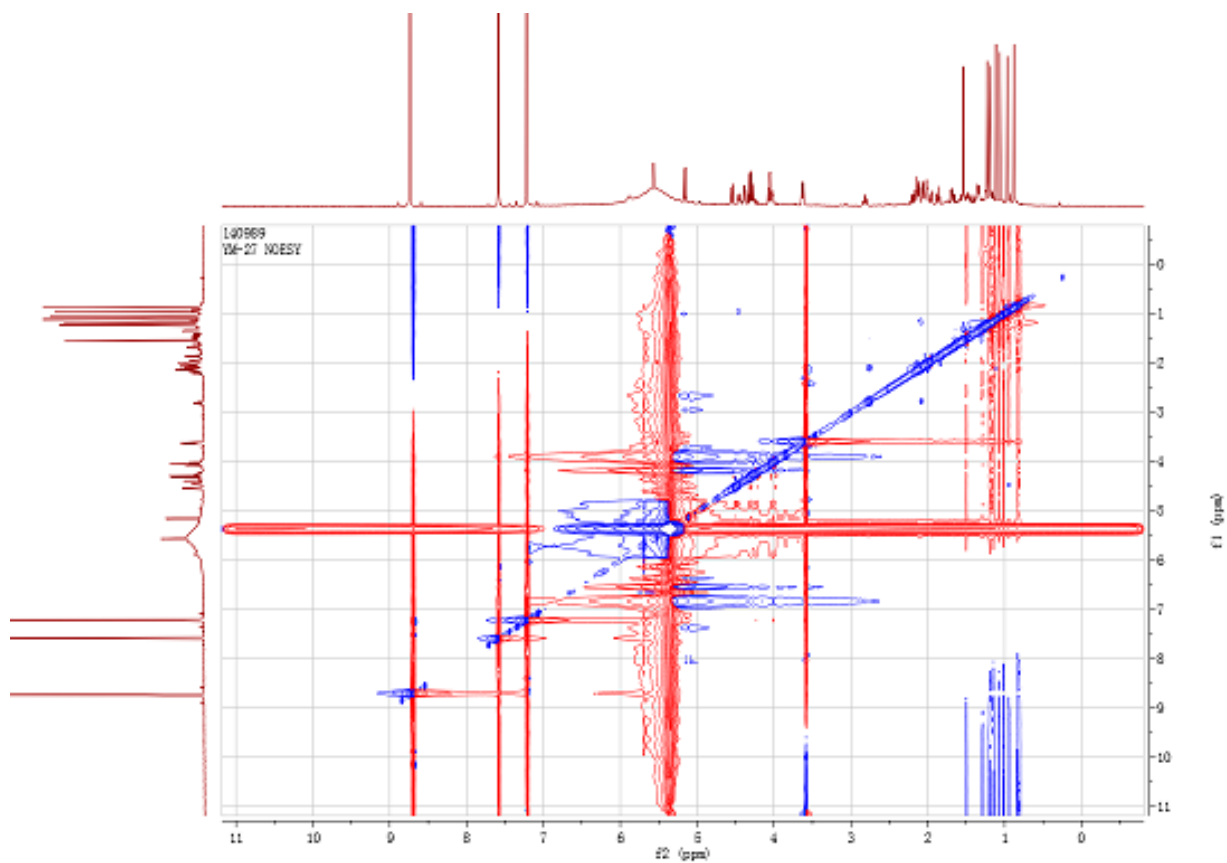

**Figure S2-11.** The Whole NOESY Spectrum of Compound **2**.

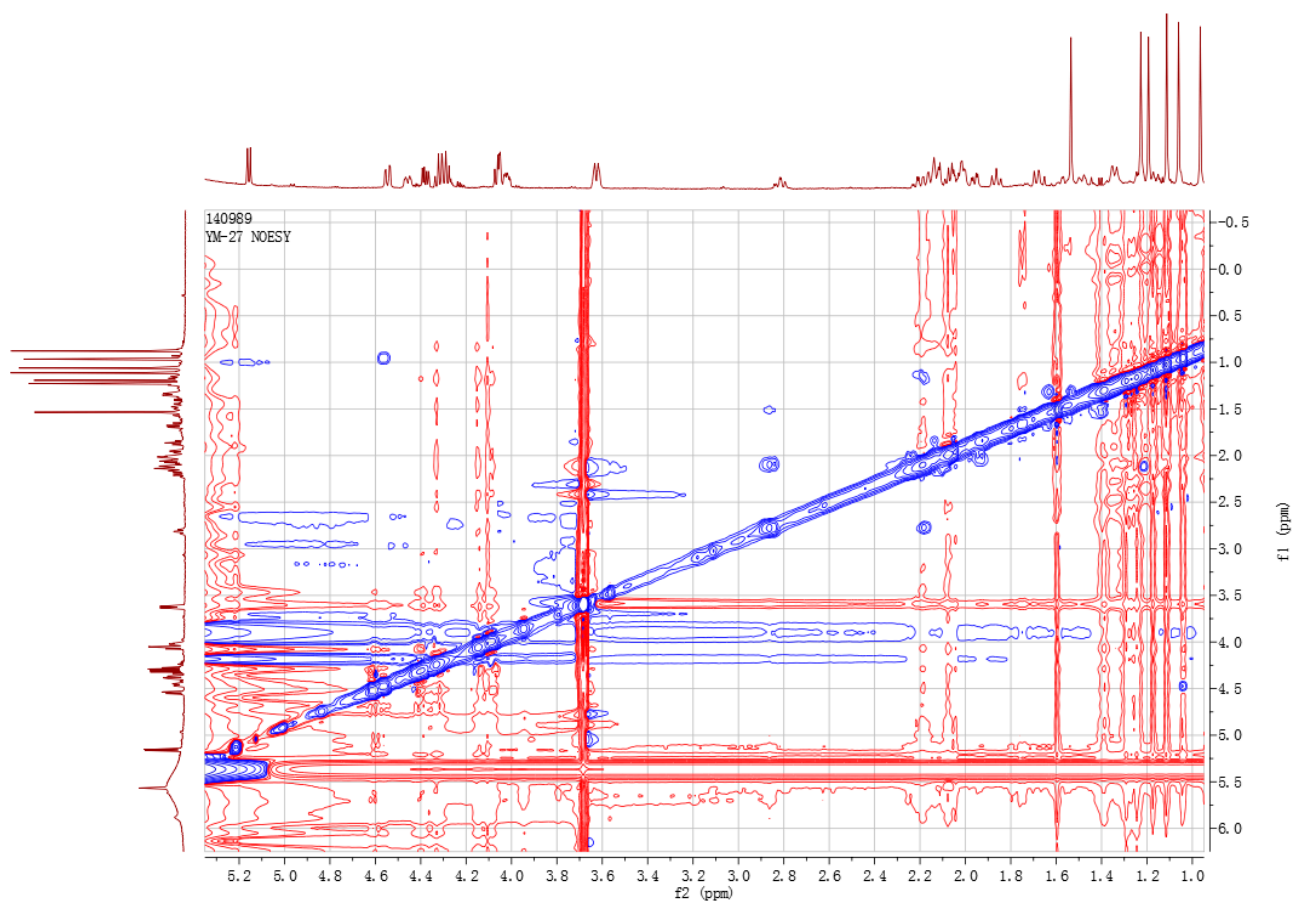

**Figure S2-11.** The Part of the NOESY Spectrum of Compound 2.

### 3. The Spectrum of Compound 3

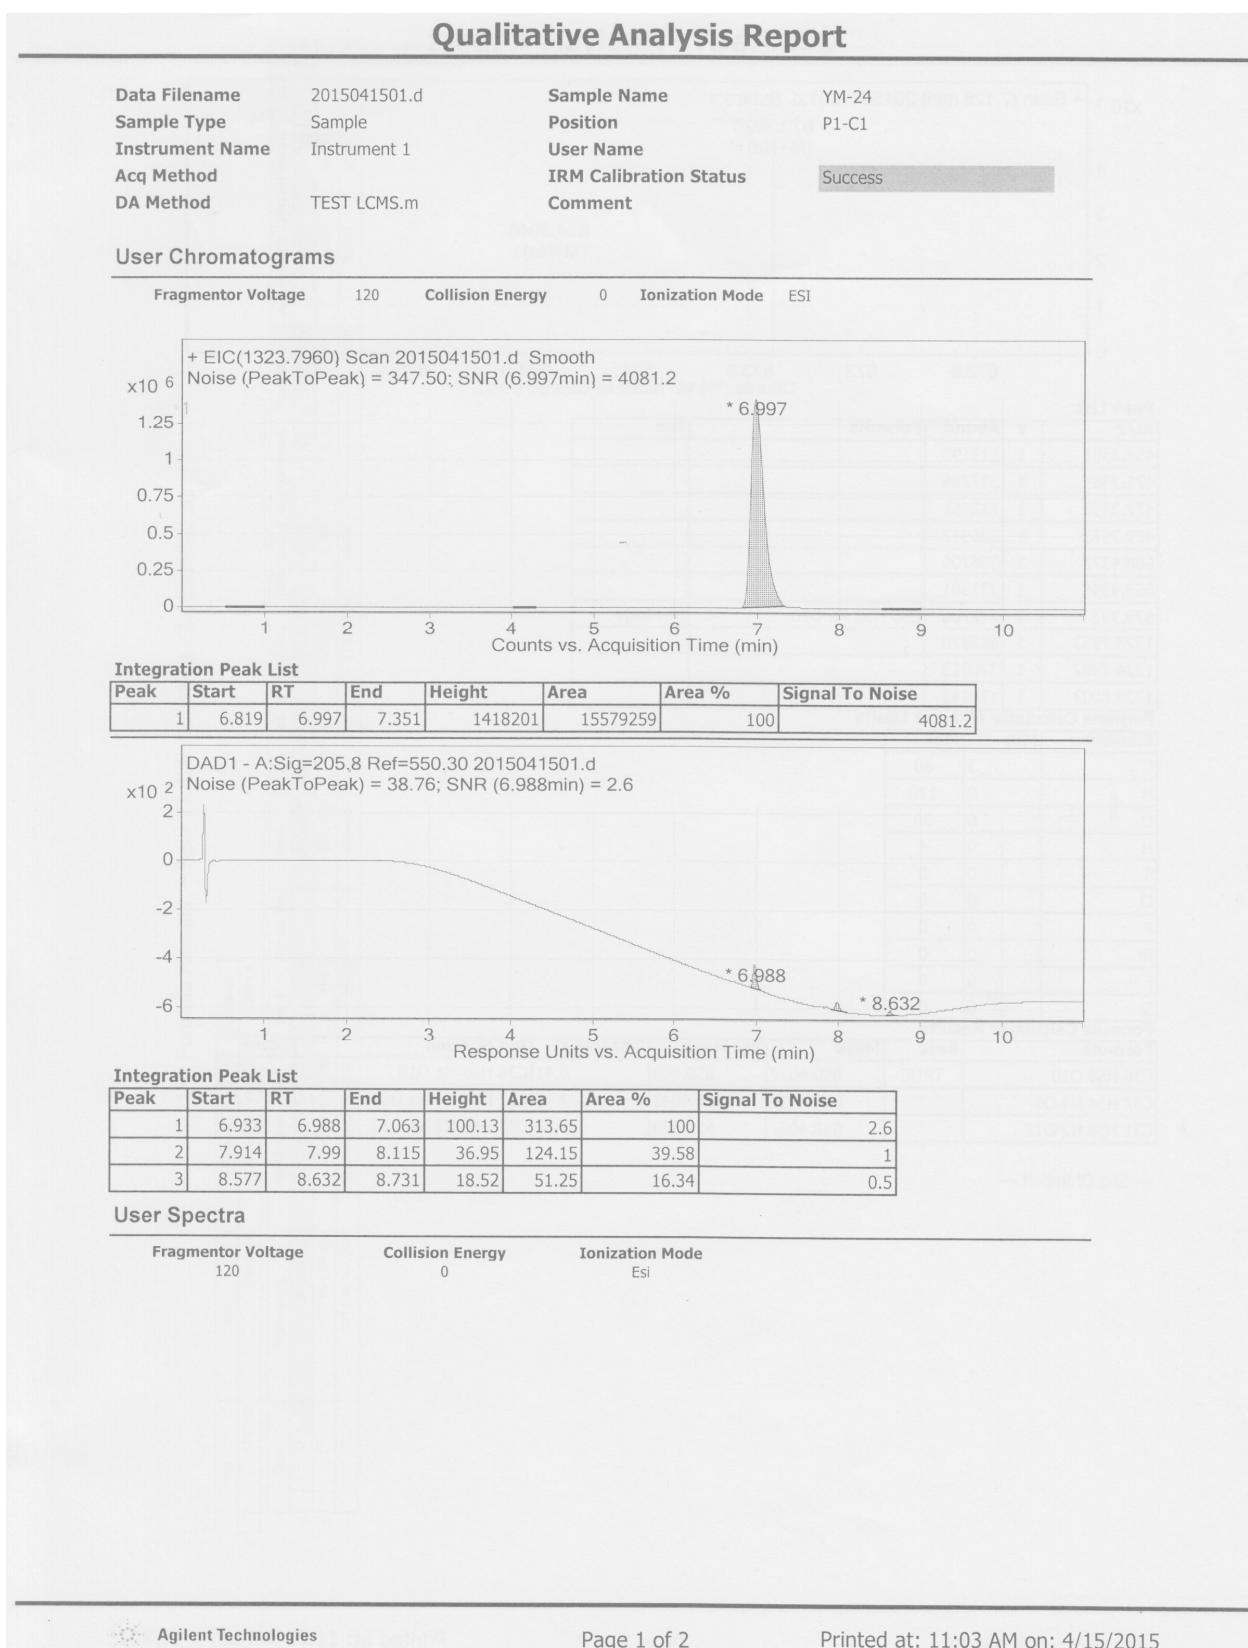

**Figure S3-1.** The Part 1 of the HR-ESI-MS Spectrum of Compound 3.

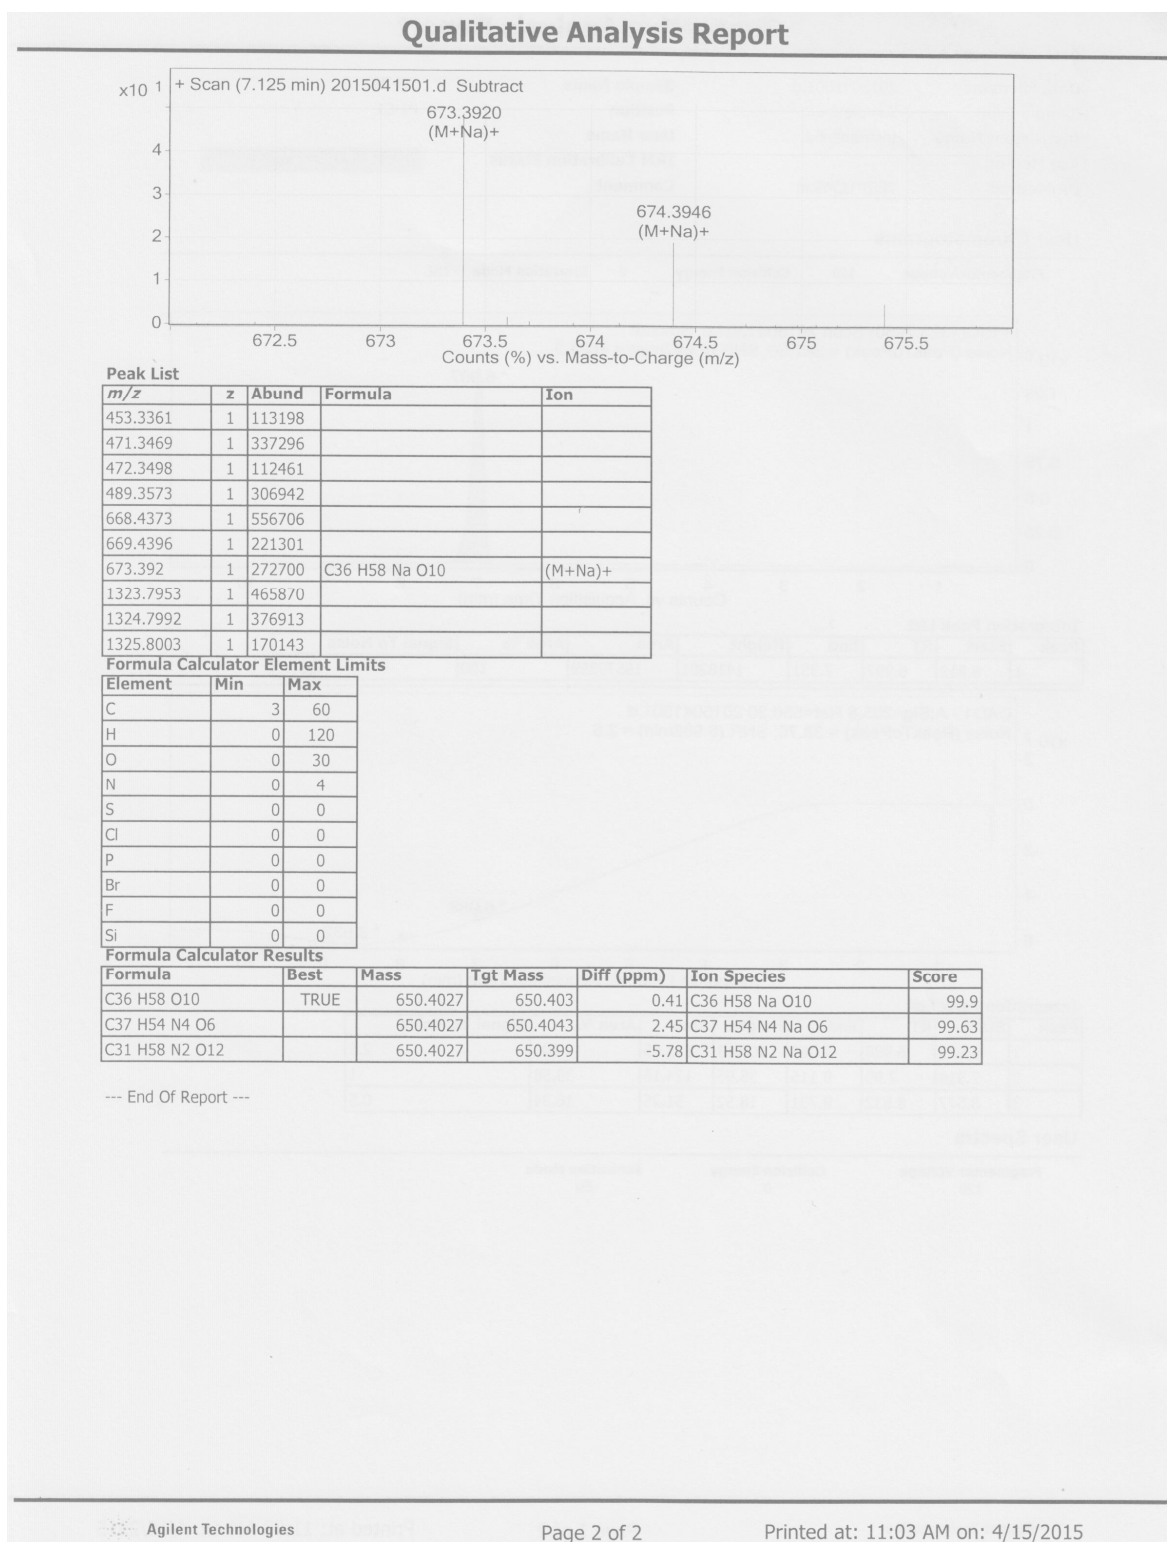

**Figure S3-2.** The Part 2 of the HR-ESI-MS Spectrum of Compound 3.

MS Formula Results: + Scan (7.125 min) Sub (2015041501.d)

| m/z     | Ion                 | Formula        | Abundance |
|---------|---------------------|----------------|-----------|
| 673.392 | (M+Na) <sup>+</sup> | C36 H58 Na O10 | 272699.6  |

  

| Best | Formula (M)    | Ion Formula       | Score | Cross Sco | Mass     | Calc Mass | Calc m/z | Diff (ppm) | Abs Diff (ppm) | Mass Match | Abund Match | Spacing Match | DBE |
|------|----------------|-------------------|-------|-----------|----------|-----------|----------|------------|----------------|------------|-------------|---------------|-----|
| ✓    | C36 H58 O10    | C36 H58 Na O10    | 99.9  |           | 650.4027 | 650.403   | 673.3922 | 0.41       | 0.41           | 99.99      | 99.88       | 99.74         | 8   |
| □    | C37 H54 N4 O6  | C37 H54 N4 Na O6  | 99.63 |           | 650.4027 | 650.4043  | 673.3936 | 2.45       | 2.45           | 99.8       | 99.22       | 99.79         | 13  |
| □    | C31 H58 N2 O12 | C31 H58 N2 Na O12 | 99.23 |           | 650.4027 | 650.399   | 673.3882 | -5.78      | 5.78           | 98.89      | 99.31       | 99.81         | 4   |

page 1

**Figure S3-3.** The Part 3 of the HR-ESI-MS Spectrum of Compound 3.

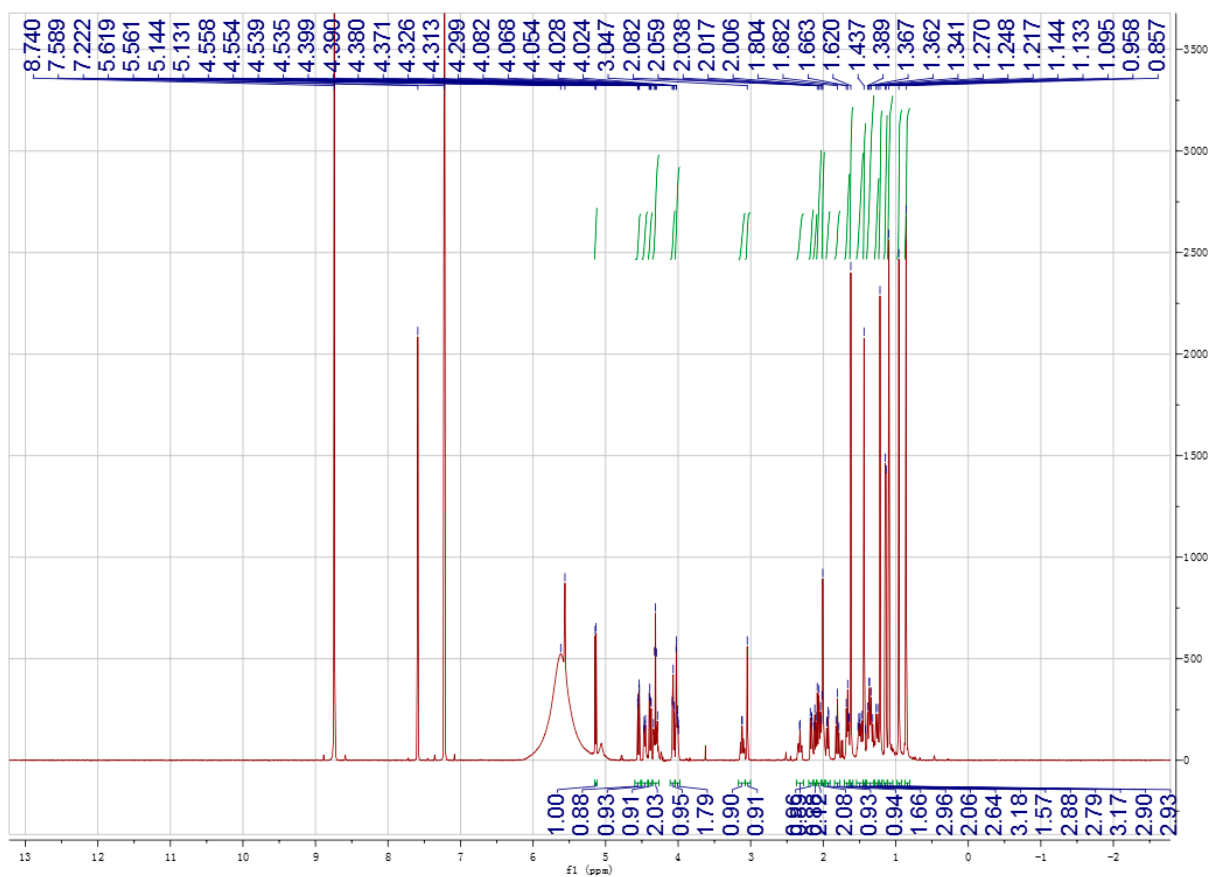

**Figure S3-4.** The Whole <sup>1</sup>H-NMR Spectrum of Compound 3.

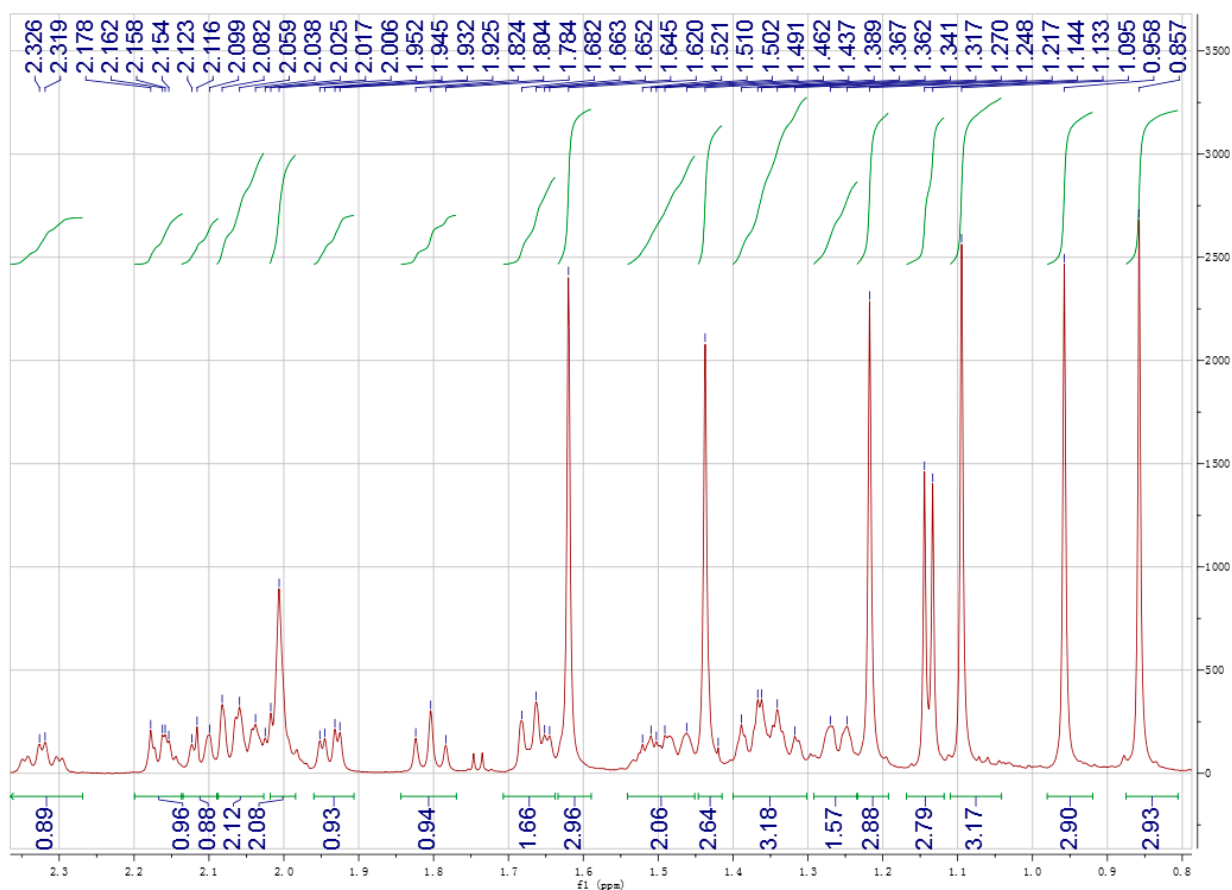

Figure S3-5. The Part 1 of the  $^1\text{H}$ -NMR Spectrum of Compound **3**.

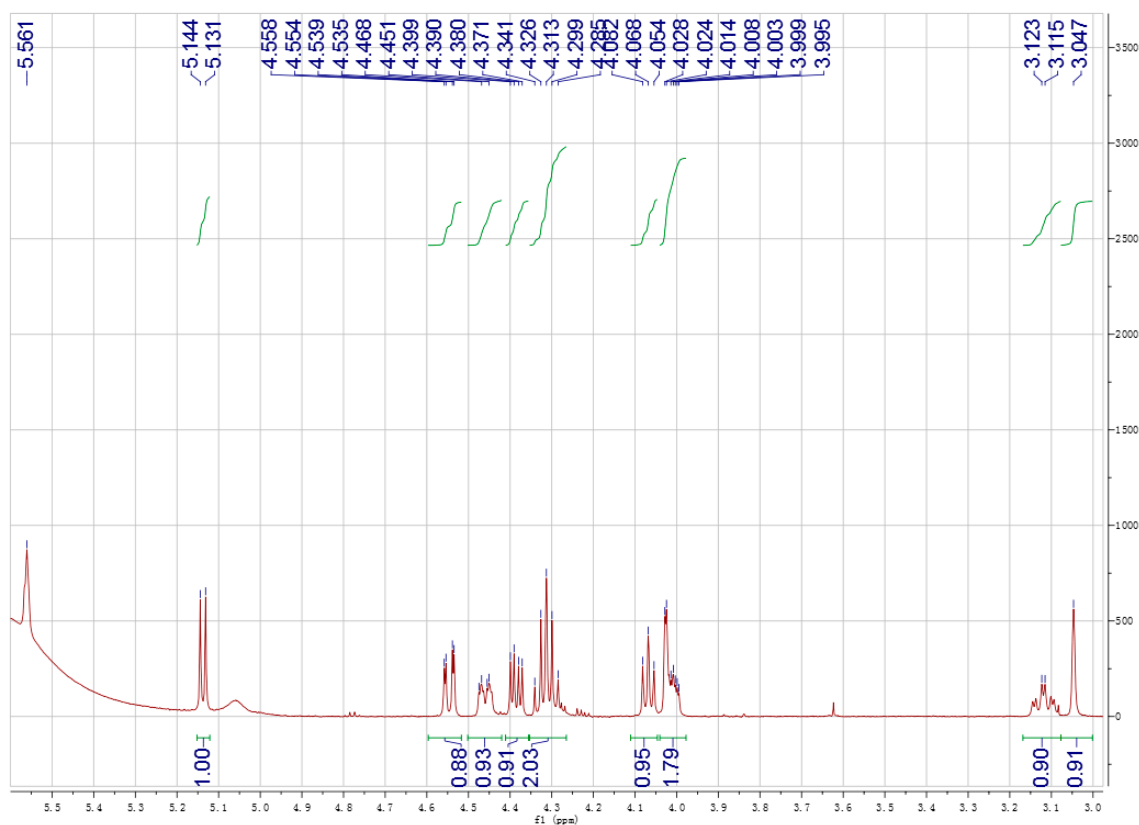

Figure S3-6. The Part 2 of the  $^1\text{H}$ -NMR Spectrum of Compound **3**.

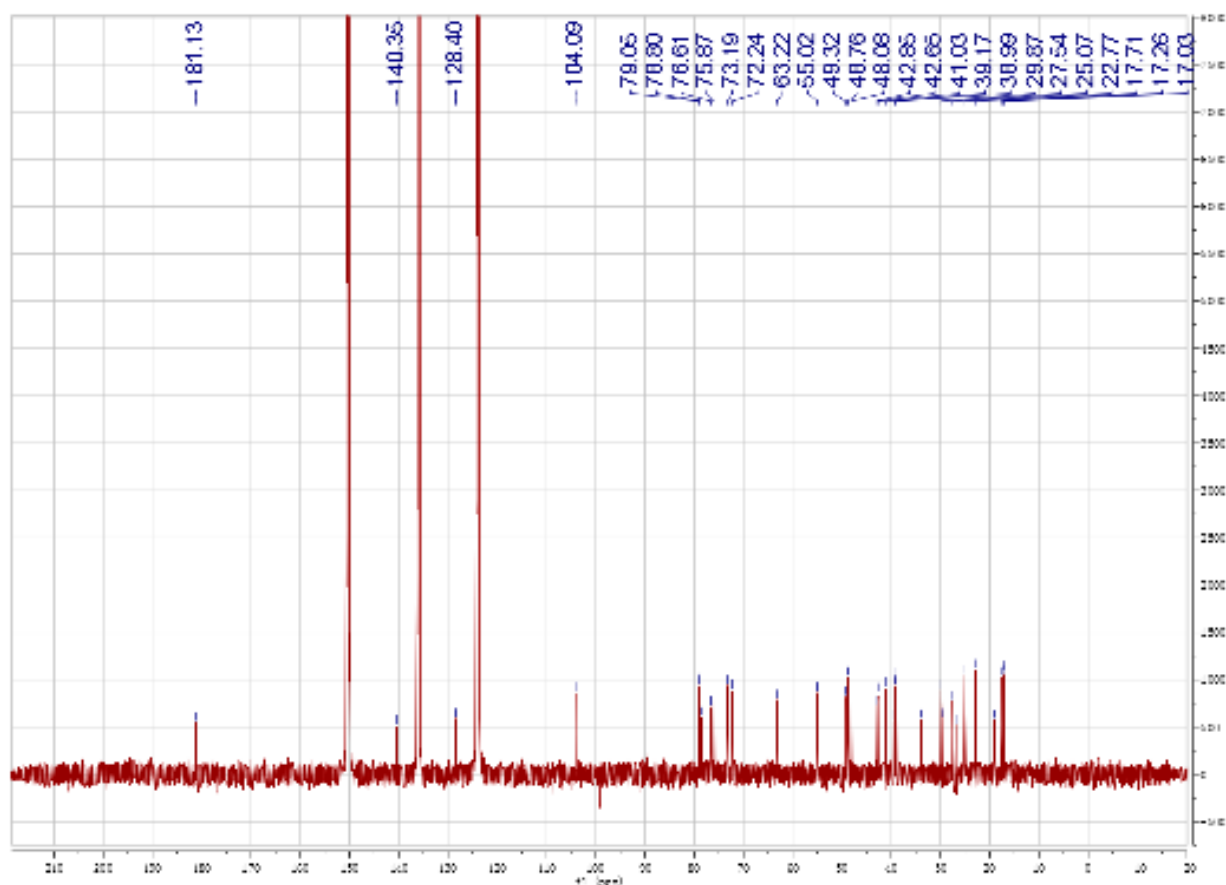

Figure S3-7. The  $^{13}\text{C}$ -NMR Spectrum of Compound 3.

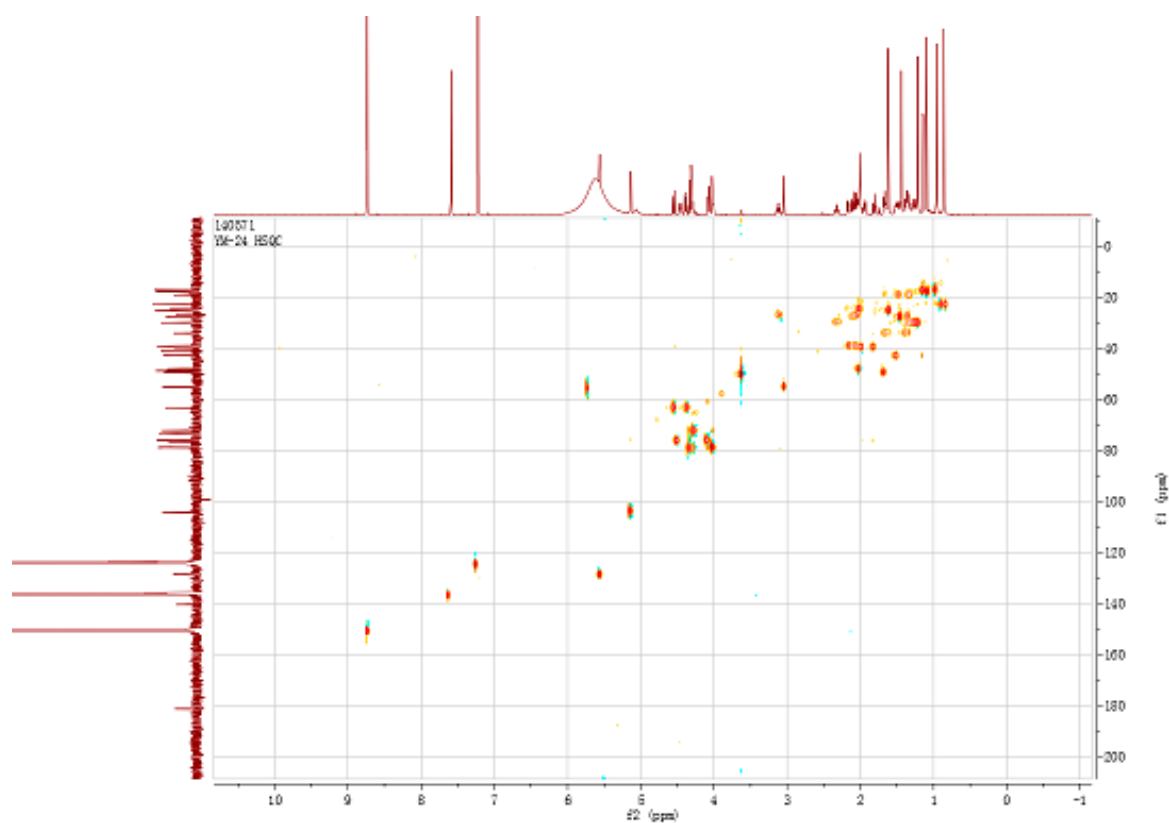

Figure S3-8. The Whole HSQC Spectrum of Compound 3.



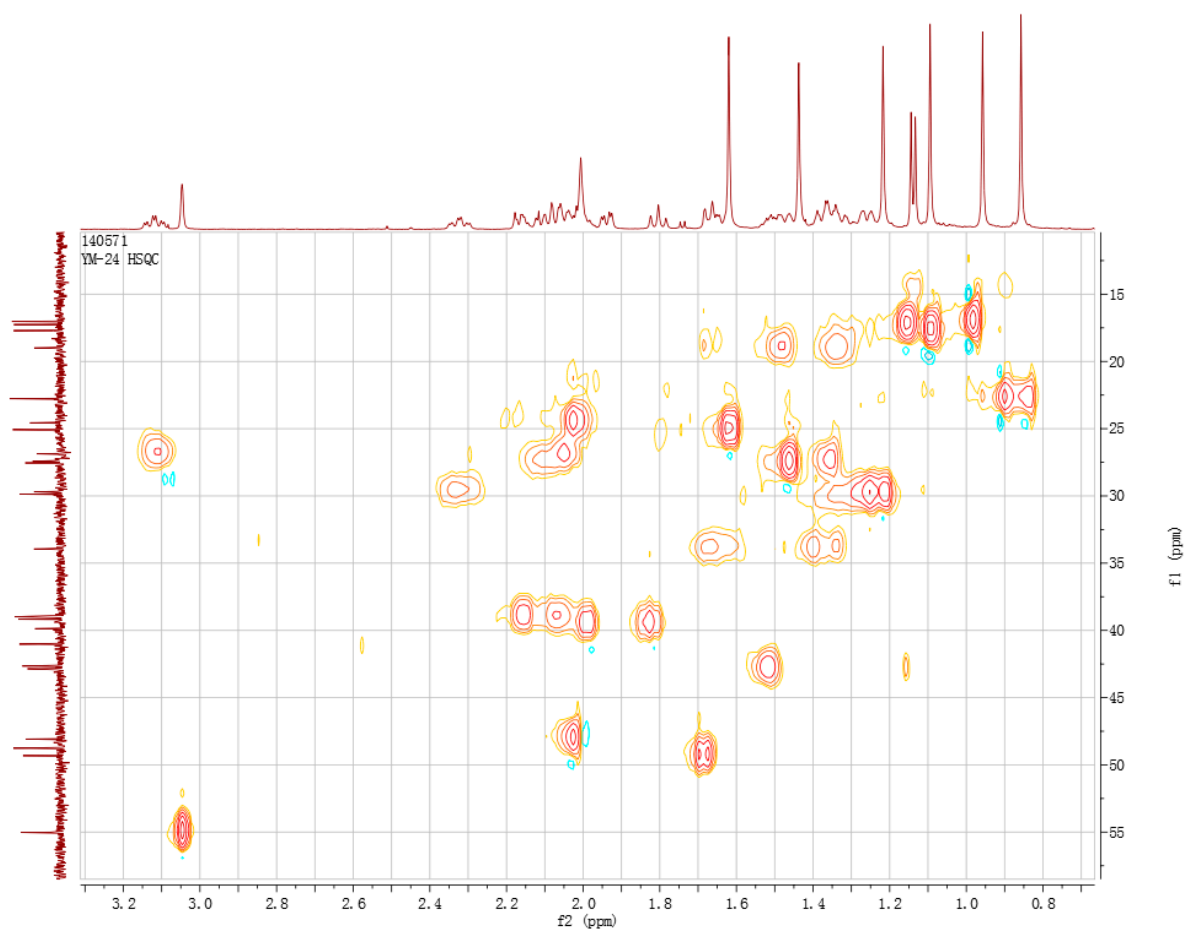

**Figure S3-9.** The Part 1 of the HSQC Spectrum of Compound **3**.

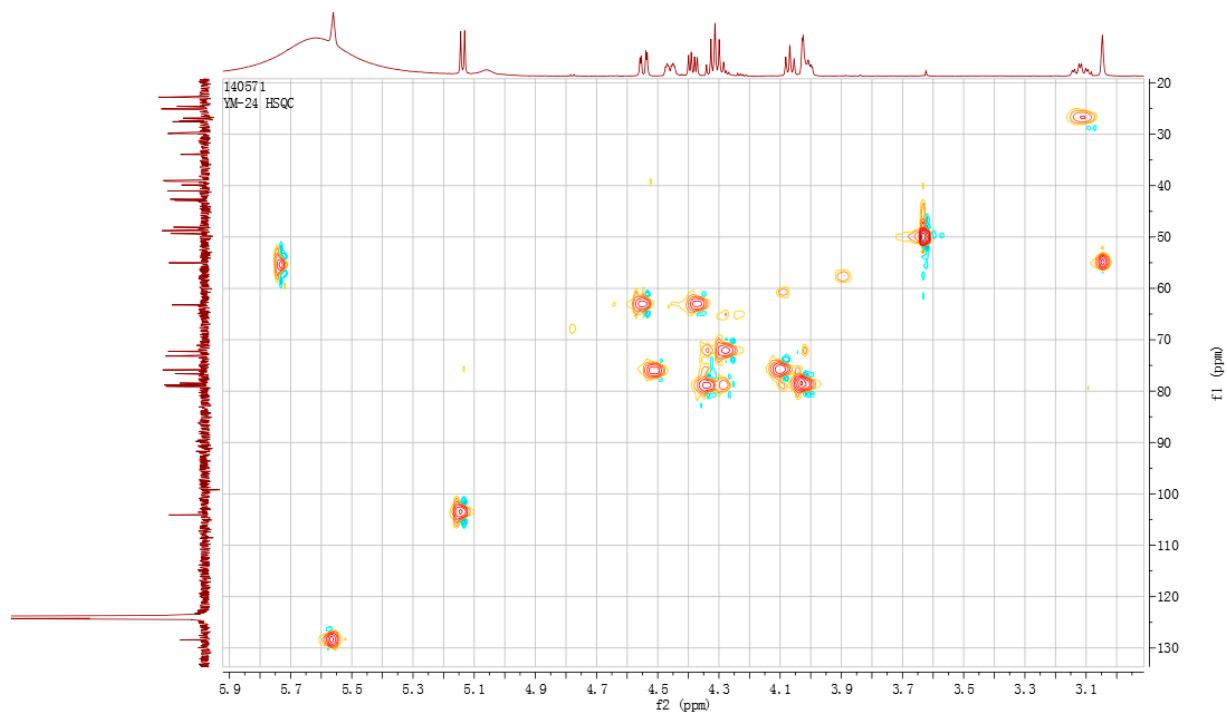

**Figure S3-10.** The Part 2 of the HSQC Spectrum of Compound **3**.



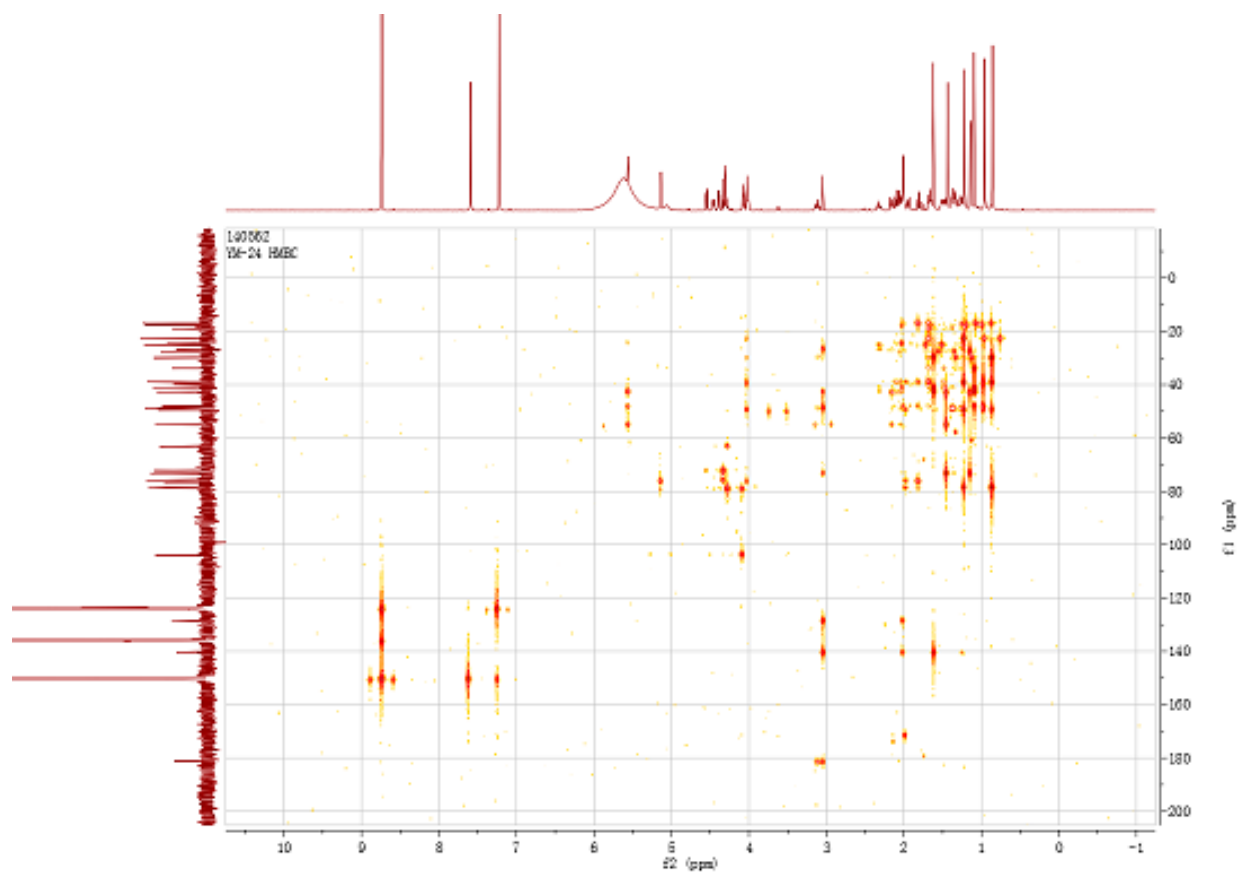

**Figure S3-11.** The Whole HMBC Spectrum of Compound **3**.

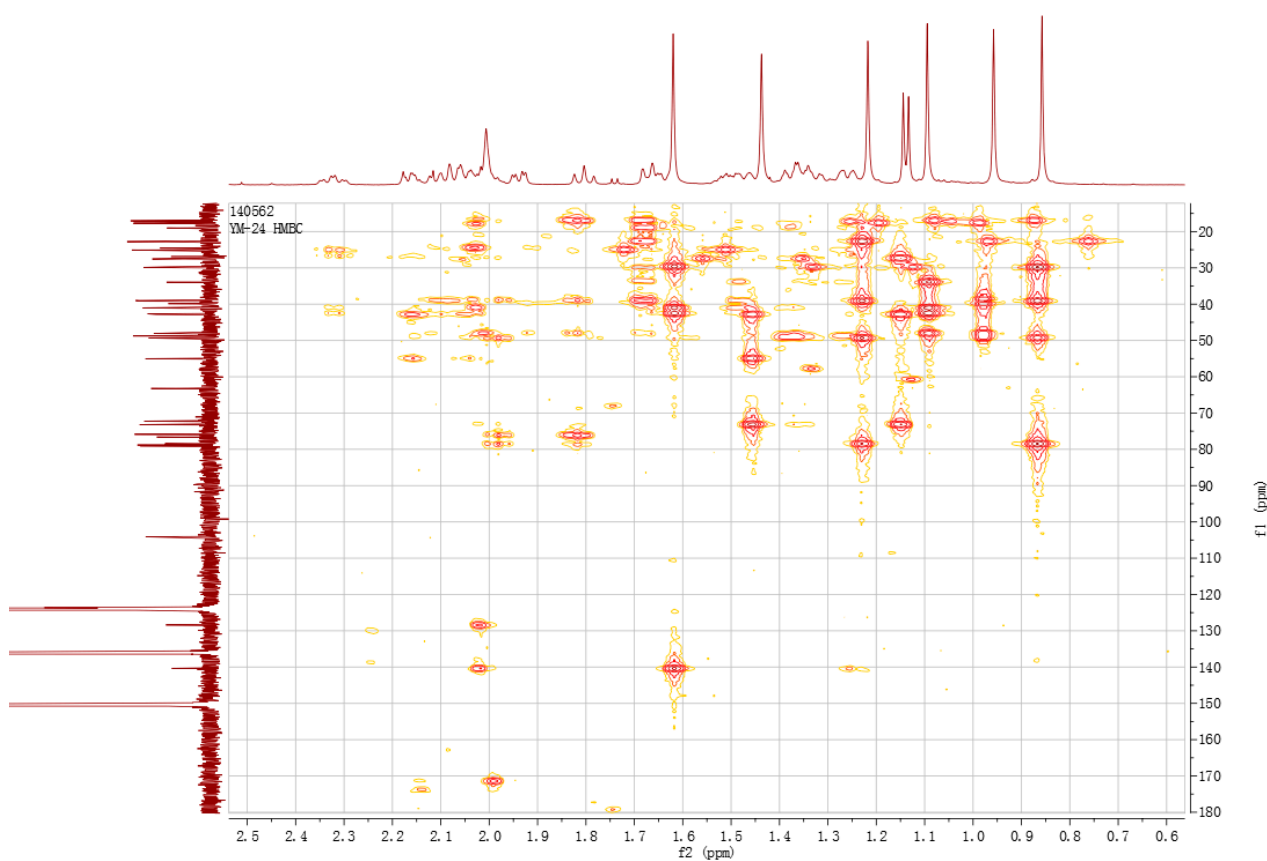

**Figure S3-12.** The Part 1 of the HMBC Spectrum of Compound **3**.

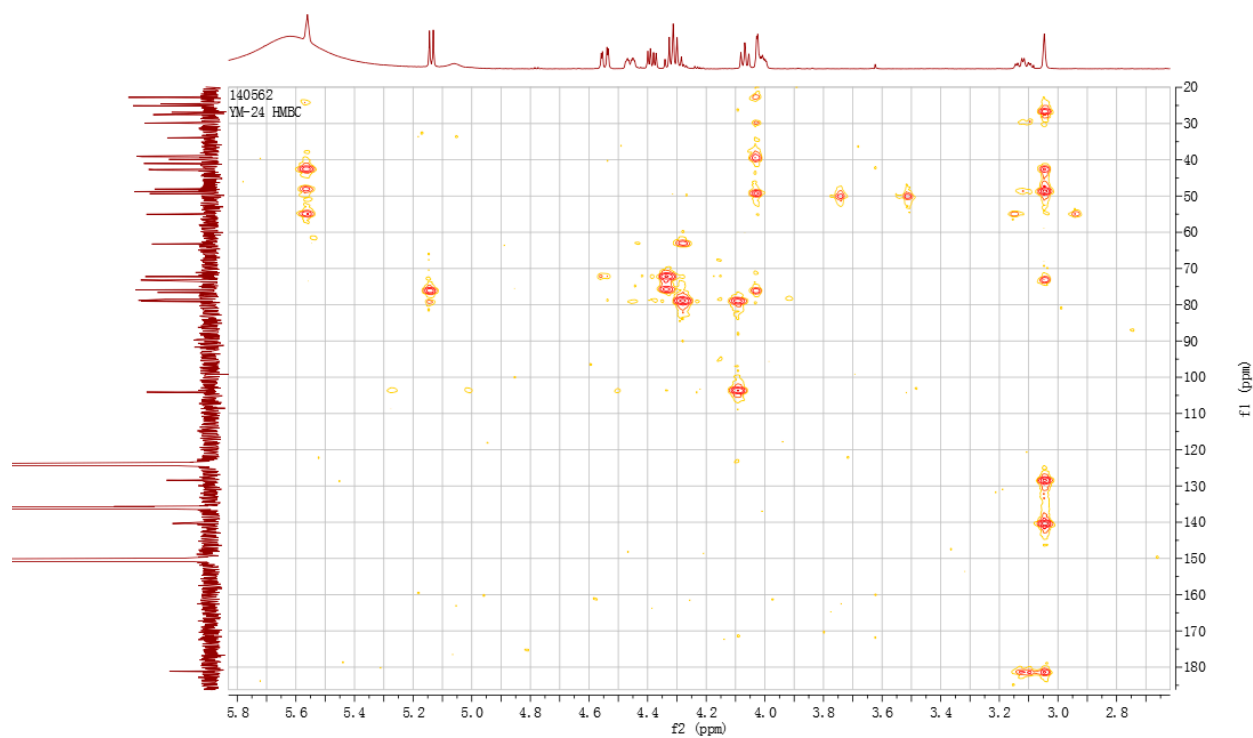

**Figure S3-13.** The Part 2 of the HMBC Spectrum of Compound **3**.

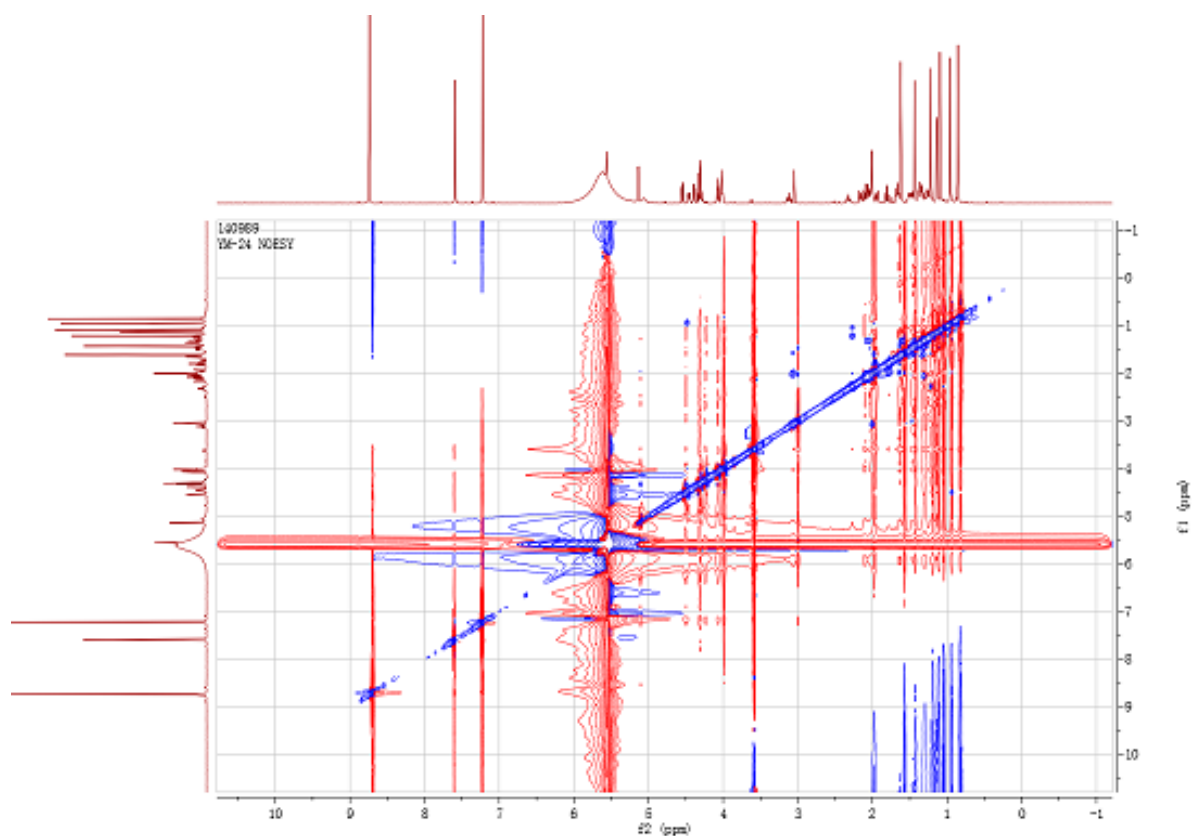

**Figure S3-14.** The NOESY Spectrum of Compound **3**.

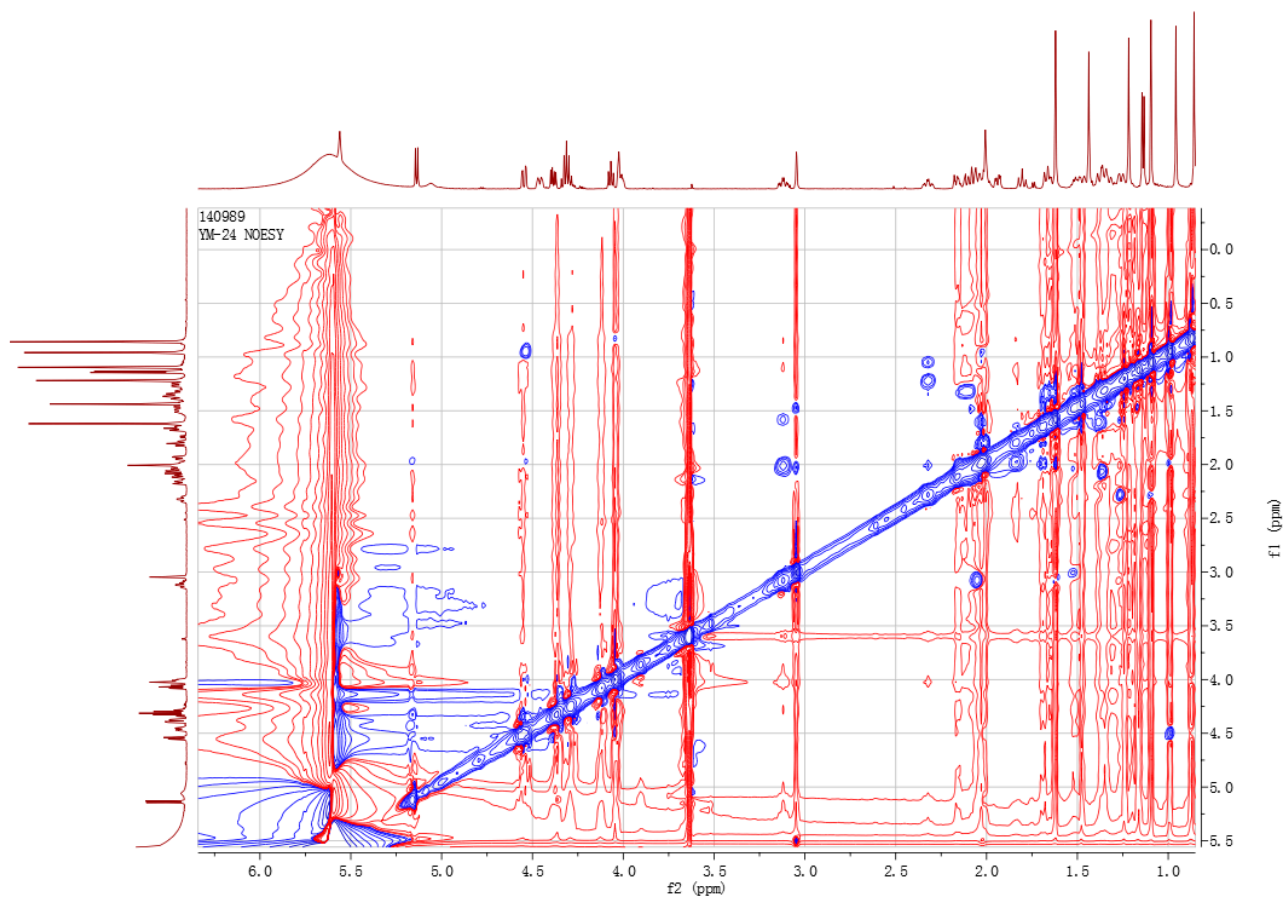

**Figure S3-15.** The Part of the NOESY Spectrum of Compound **3**.

#### 4. The Spectrum of Compound 4

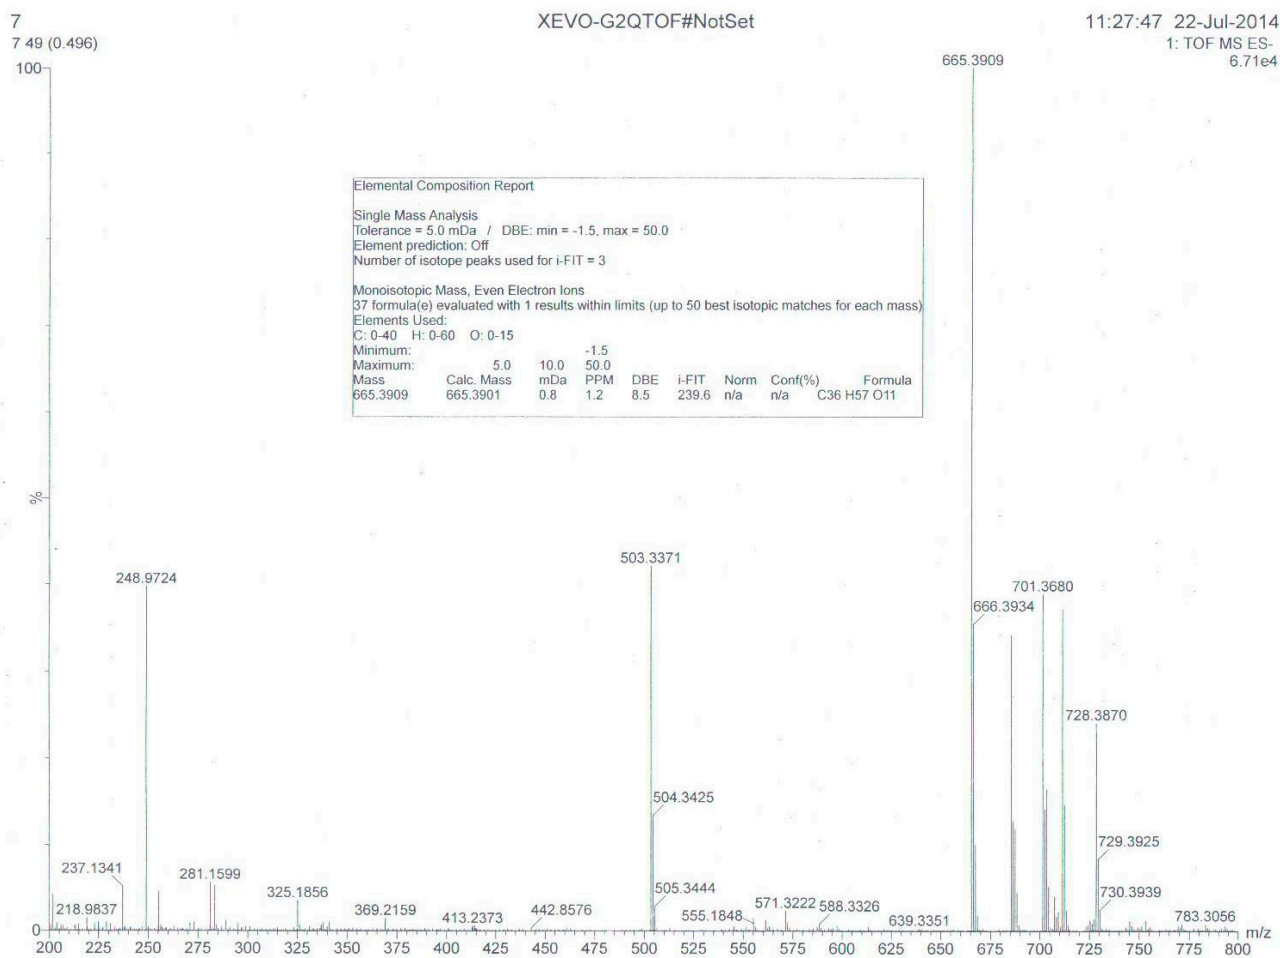

**Figure S4-1.** The HR-ESI-MS Spectrum of Compound 4.

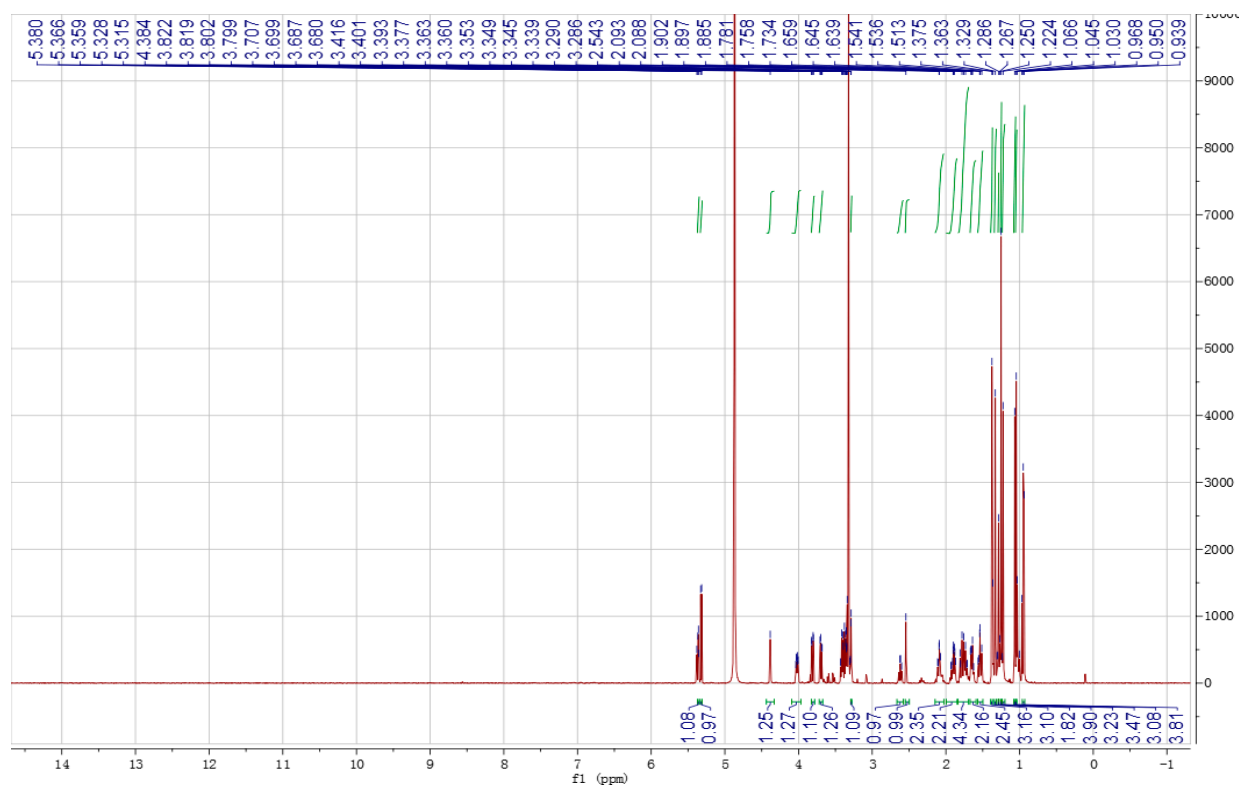

**Figure S4-2.** The Whole  $^1\text{H}$ -NMR Spectrum of Compound **4**.

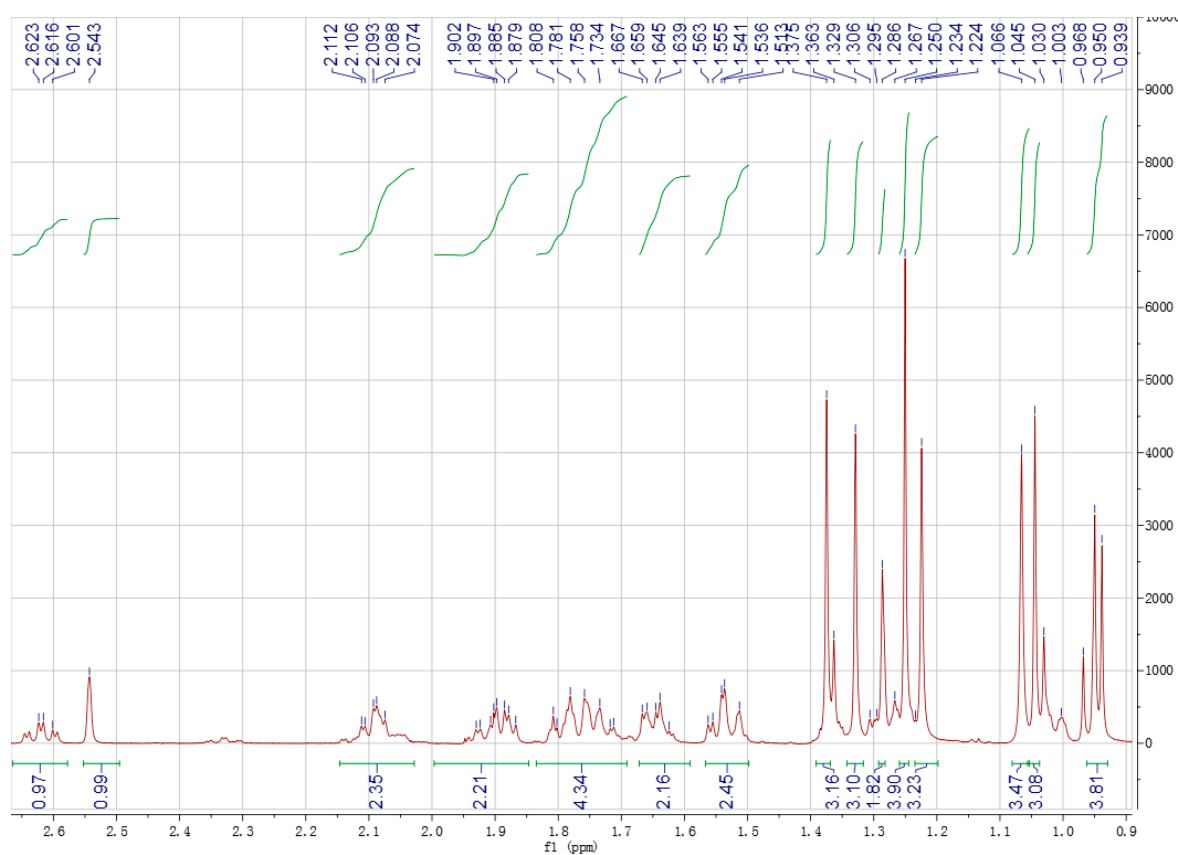

**Figure S4-3.** The Part 1 of the  $^1\text{H}$ -NMR Spectrum of Compound **4**.

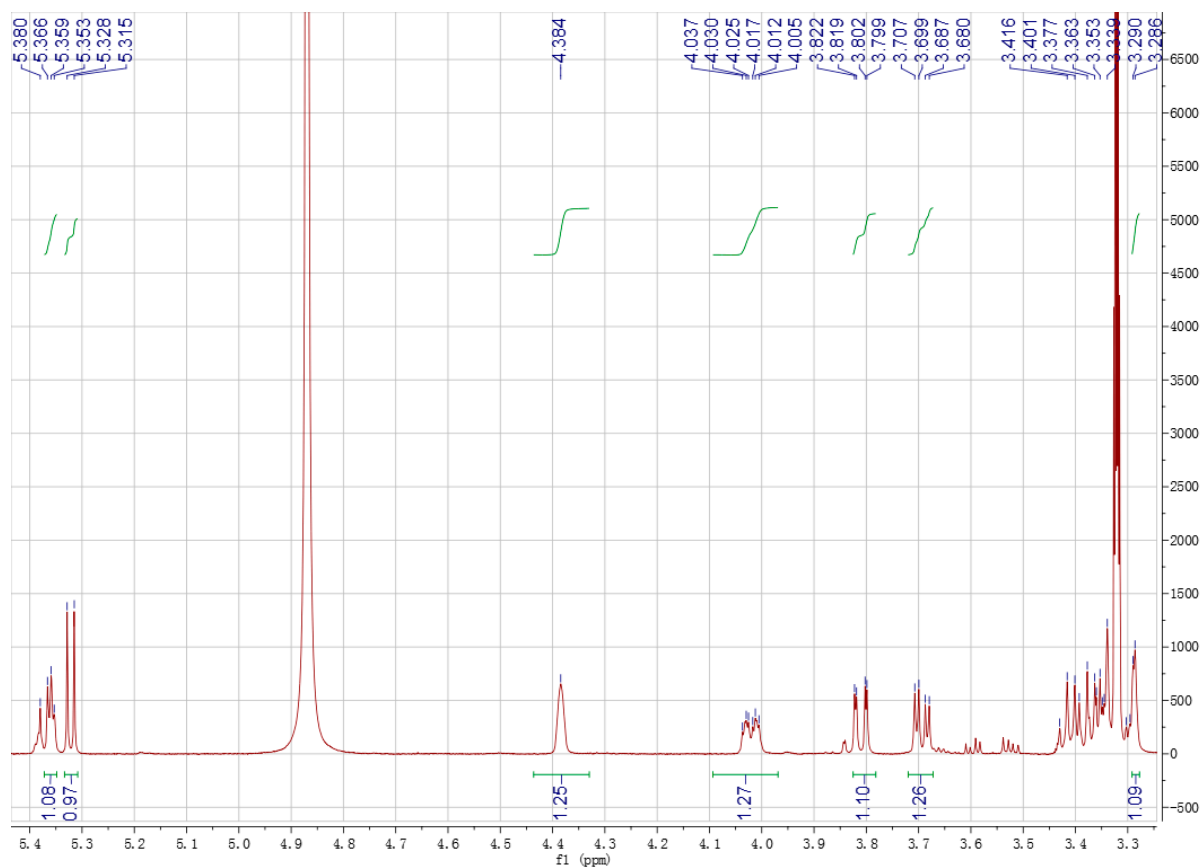

Figure S4-4. The Part 2 of the  $^1\text{H}$ -NMR Spectrum of Compound 4.

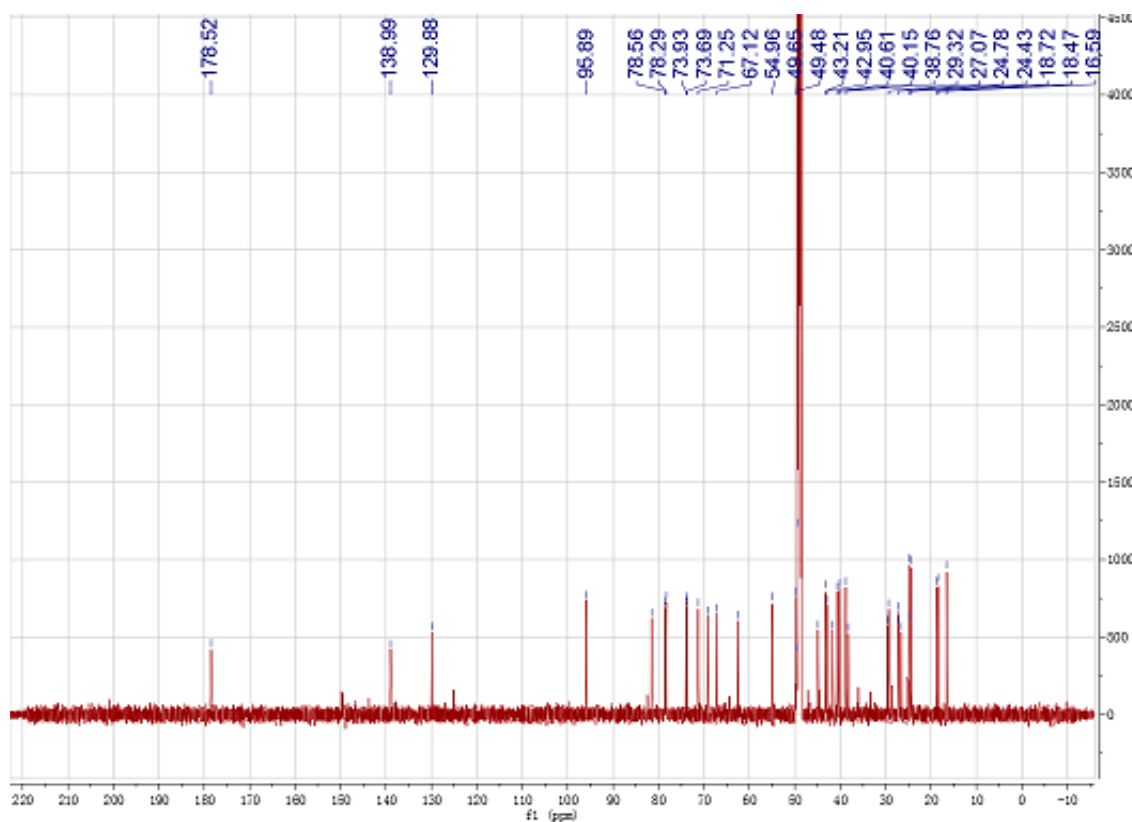

Figure S4-5. The  $^{13}\text{C}$ -NMR Spectrum of Compound 4.

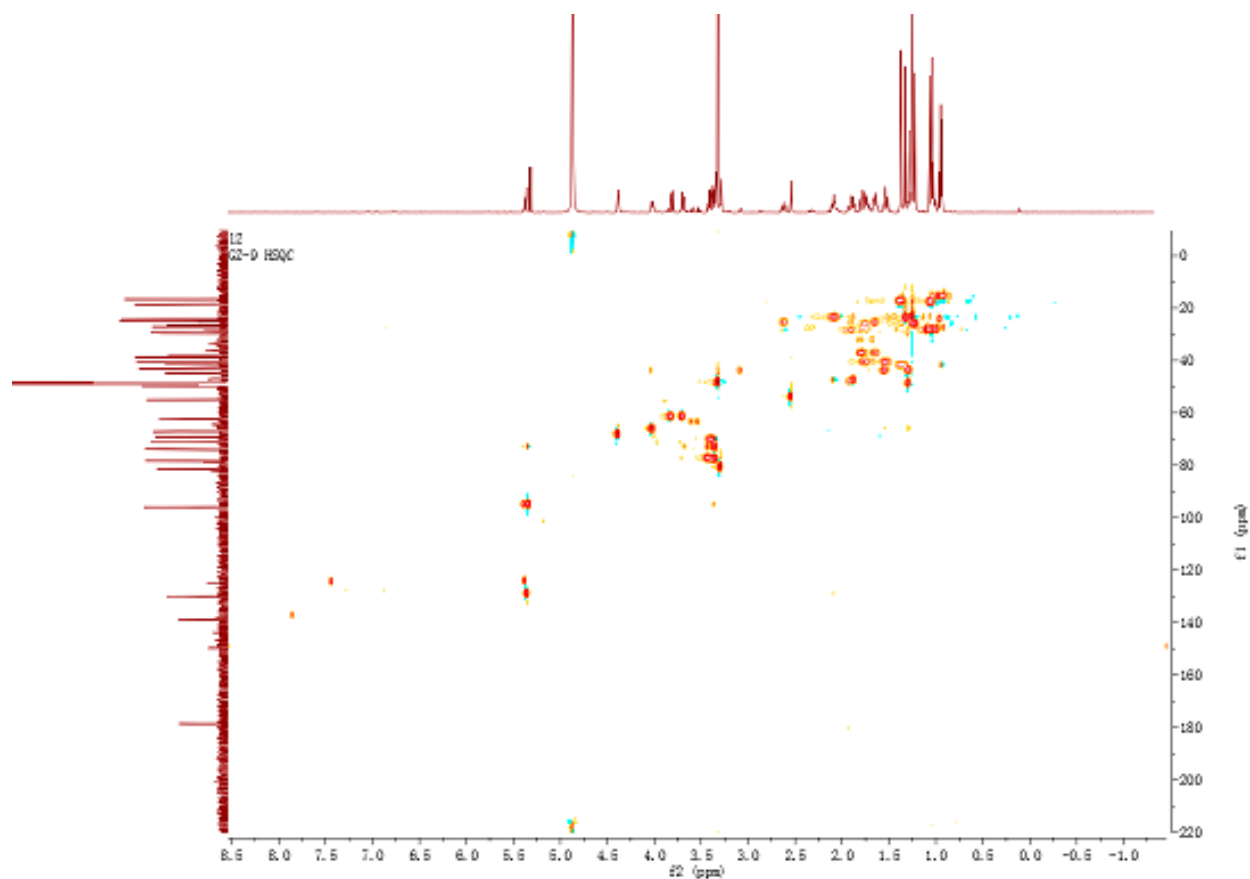

**Figure S4-6.** The Whole HSQC Spectrum of Compound **4**.

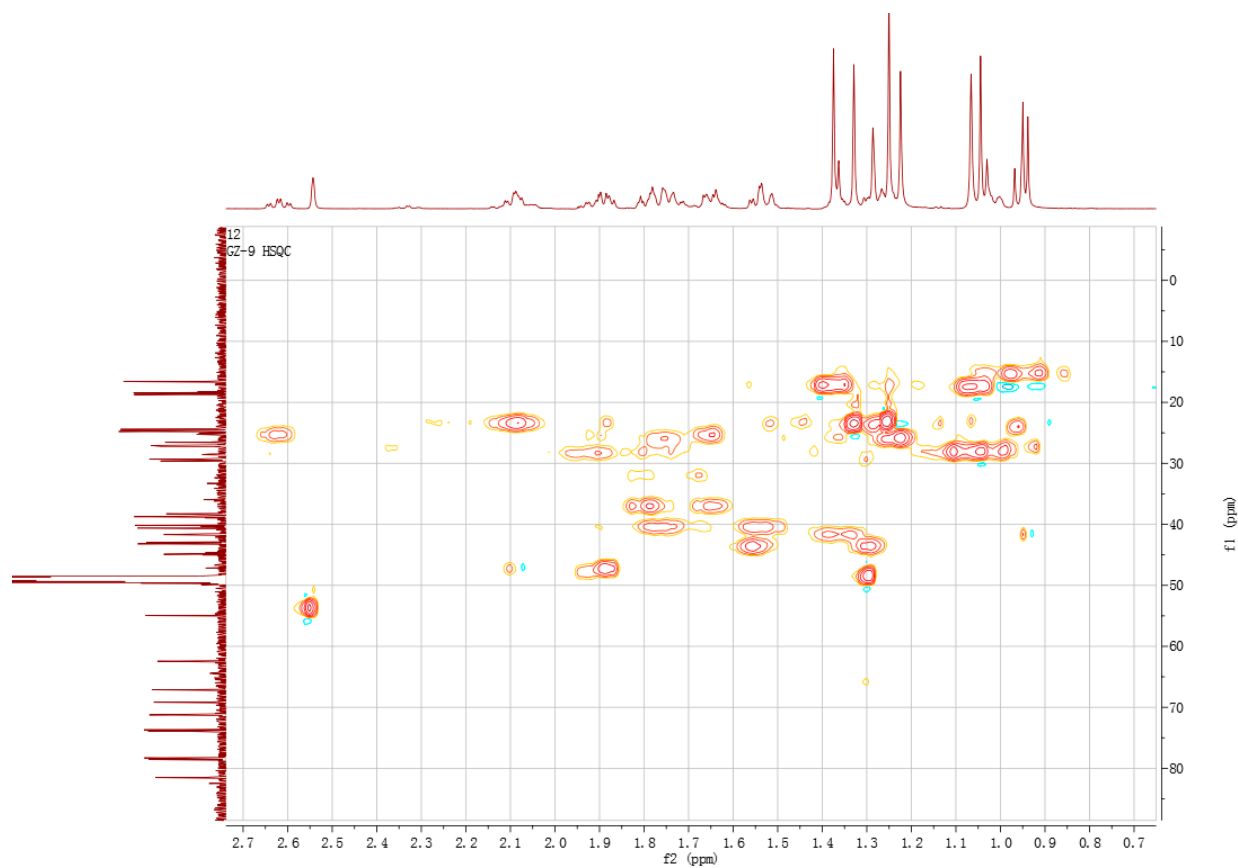

**Figure S4-7.** The Part 1 of the HSQC Spectrum of Compound **4**.

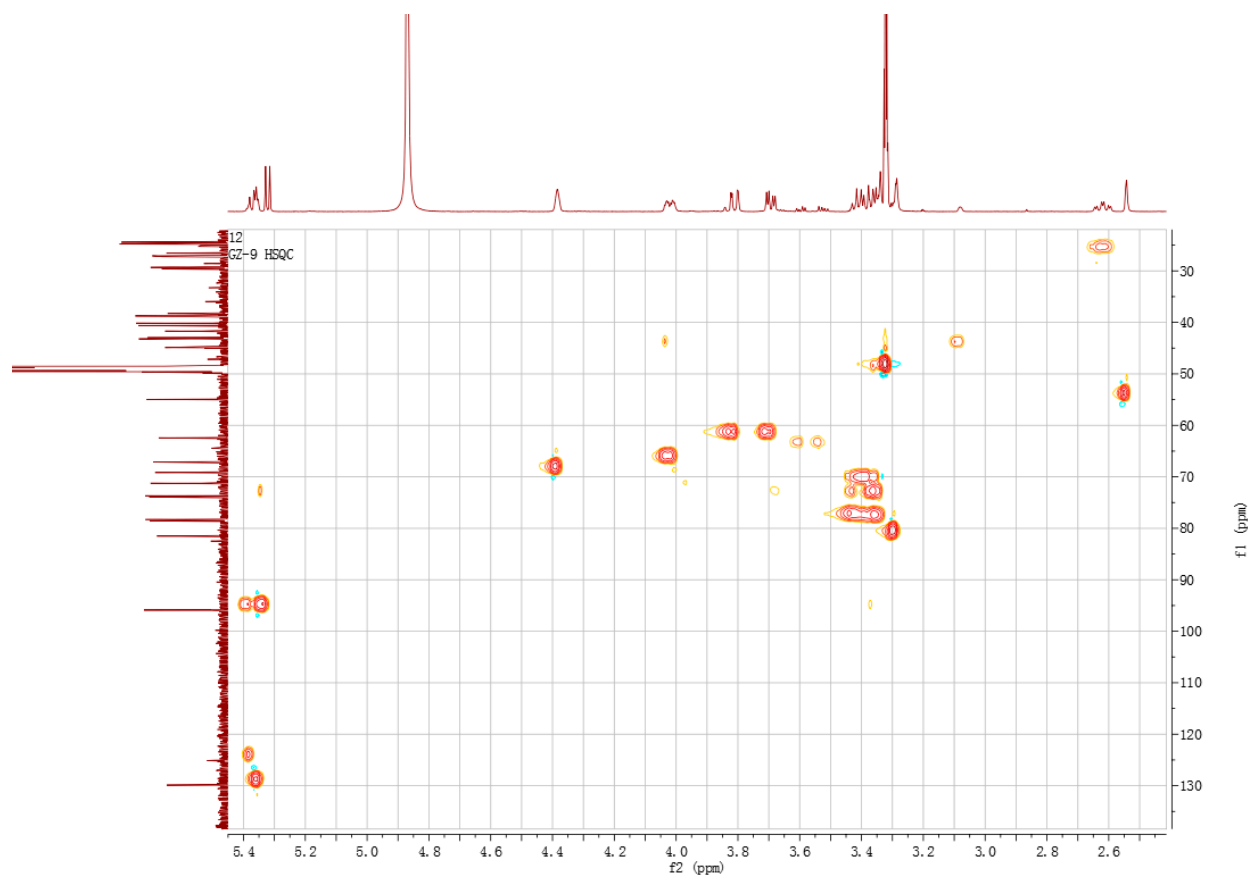

**Figure S4-8.** The Part 2 of the HSQC Spectrum of Compound 4.

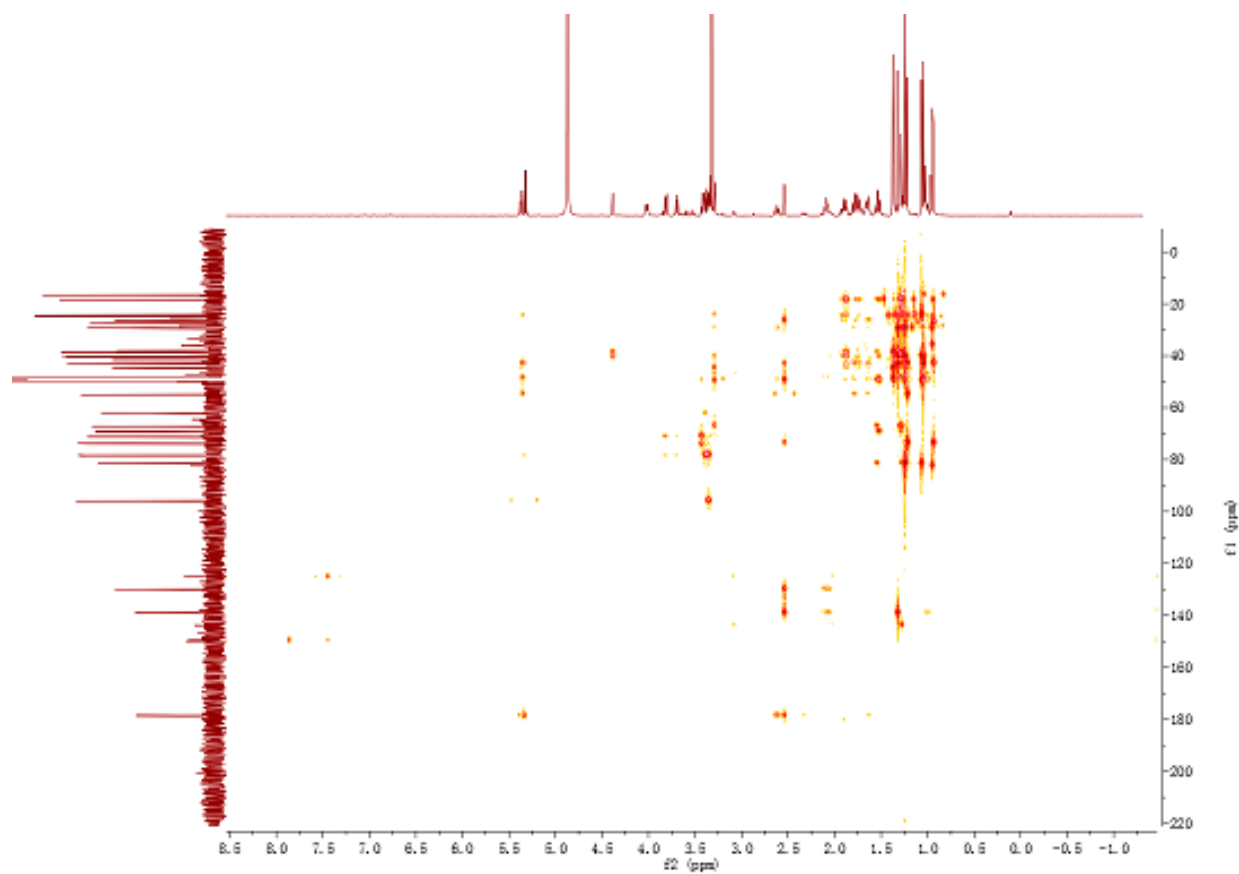

**Figure S4-9.** The Whole HMBC Spectrum of Compound 4.



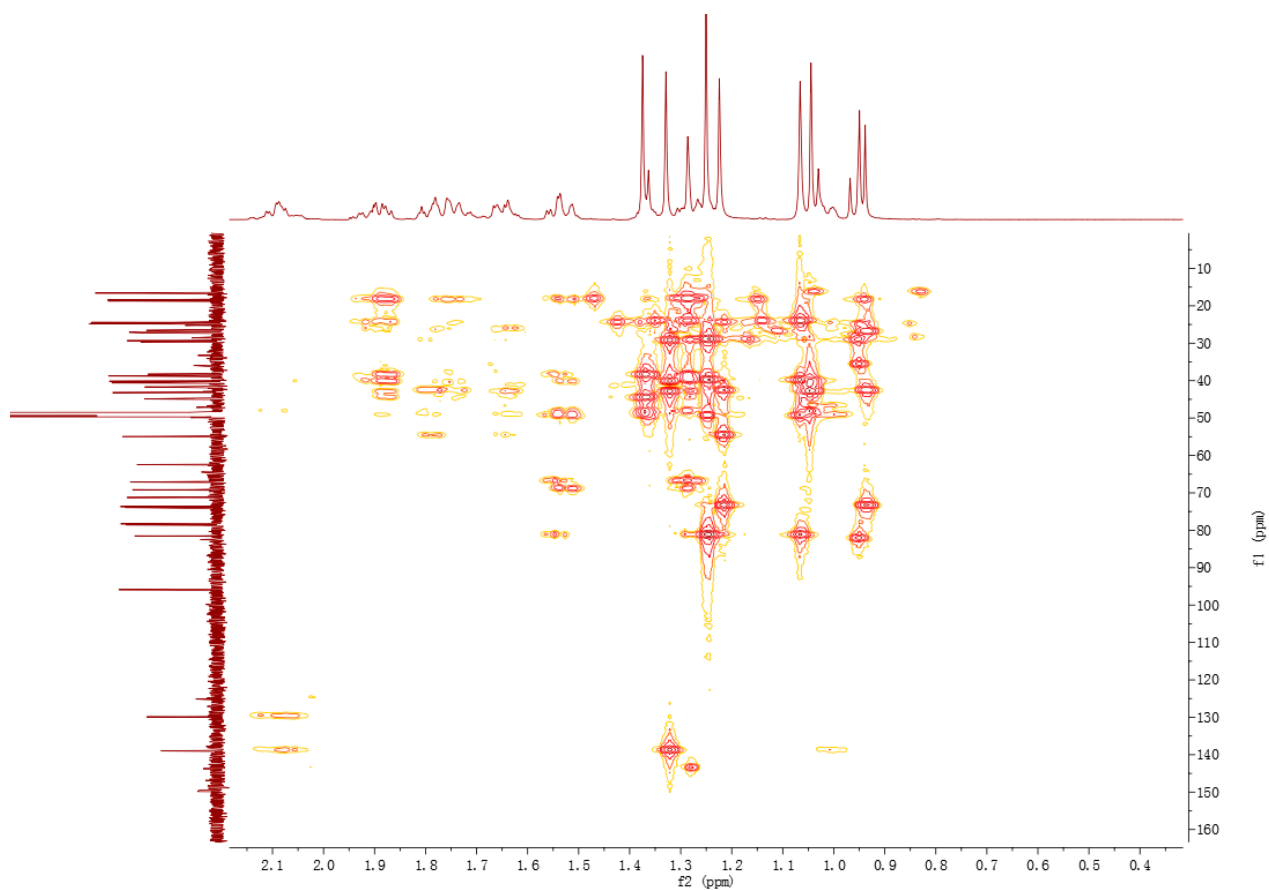

**Figure S4-10.** The Part 1 of the HMBC Spectrum of Compound **4**.

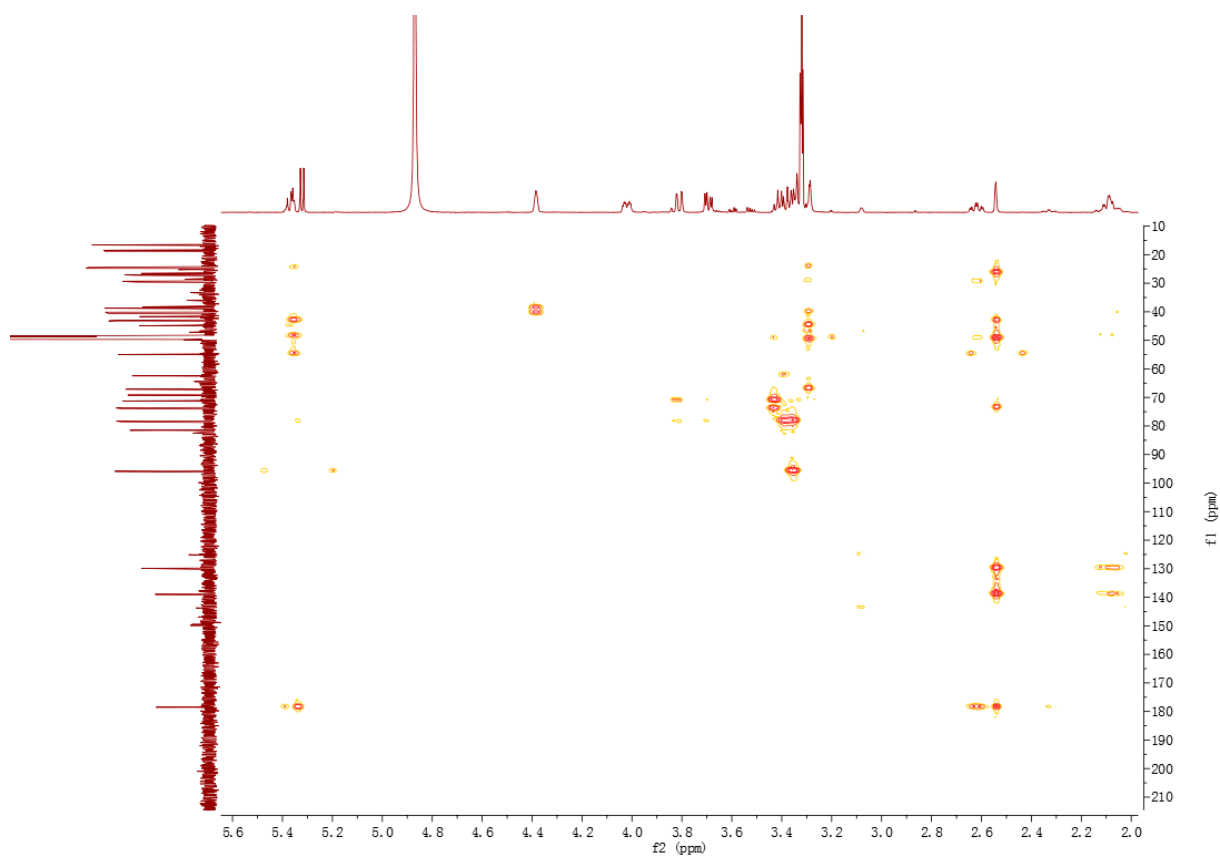

**Figure S4-11.** The Part 2 of the HMBC Spectrum of Compound **4**.

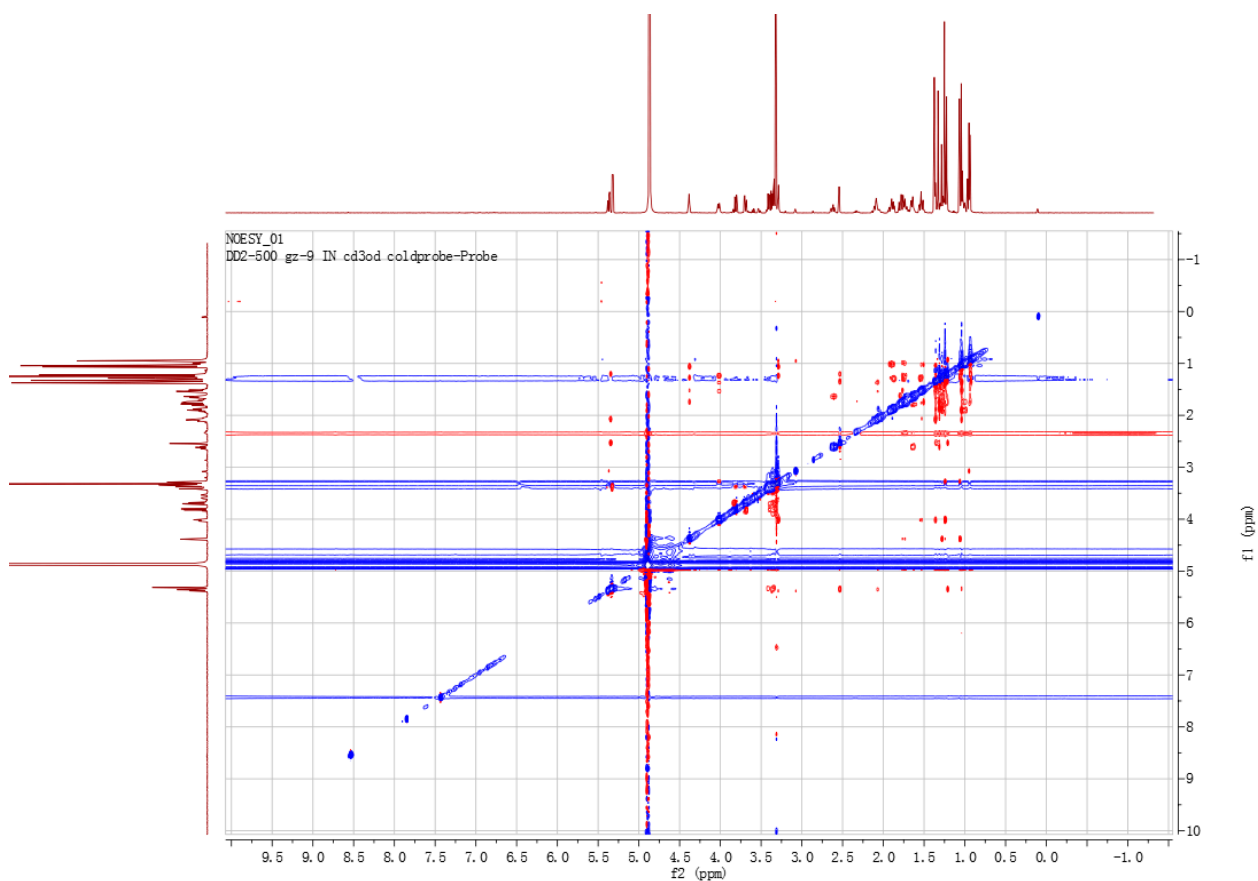

**Figure S4-12.** The Whole NOESY Spectrum of Compound 4.

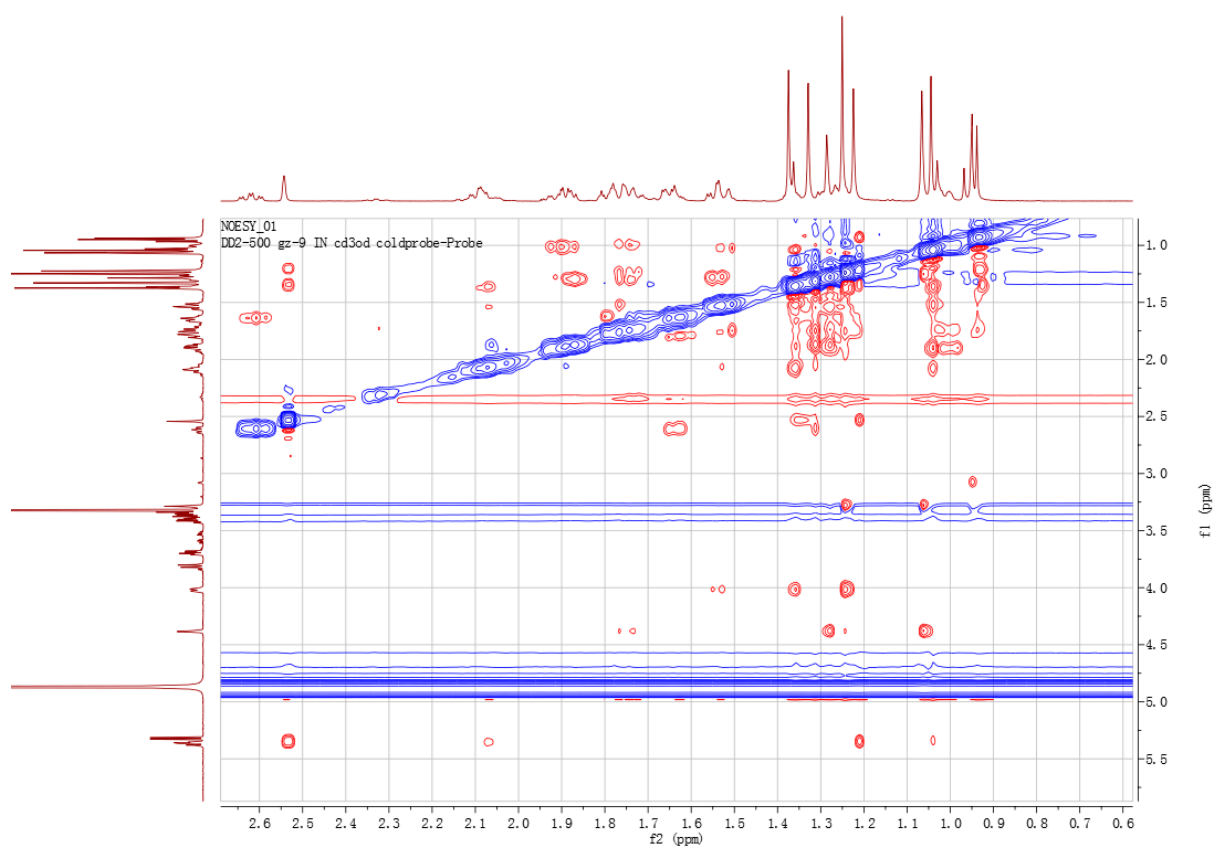

**Figure S4-13.** The Part 1 of the NOESY Spectrum of Compound 4.

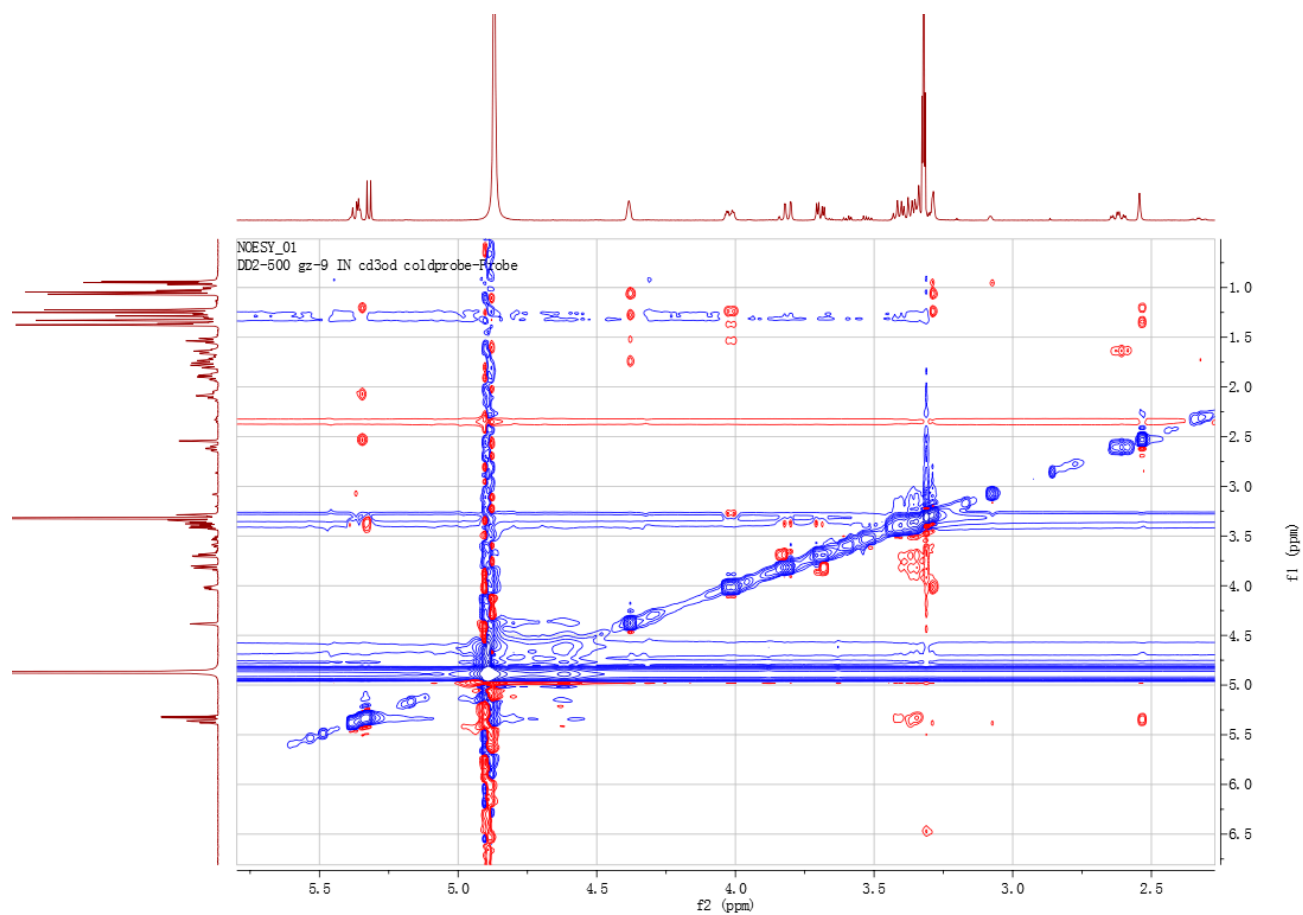

**Figure S4-14.** The Part 2 of the NOESY Spectrum of Compound 4.
